# Supplementary material for: PLEKHA5, PLEKHA6, and PLEKHA7 bind to PDZD11 to target the Menkes ATPase ATP7A to the cell periphery and regulate copper homeostasis
Source: PubMed Central journal article supplement — Mol Biol Cell. 2021 Nov 1;32(21):ar34. doi: 10.1091/mbc.E21-07-0355 (PMC8693958; doi:10.1091/mbc.e21-07-0355), 2021-11-01
Supplement: mbc-32-ar34-s001.pdf [file mbc-32-ar34-s001.pdf]

# Supplemental Materials

Molecular Biology of the Cell

Sluysmans *et al.*

SUPPLEMENTARY MATERIAL

SUPPLEMENTARY FIGURE LEGENDS

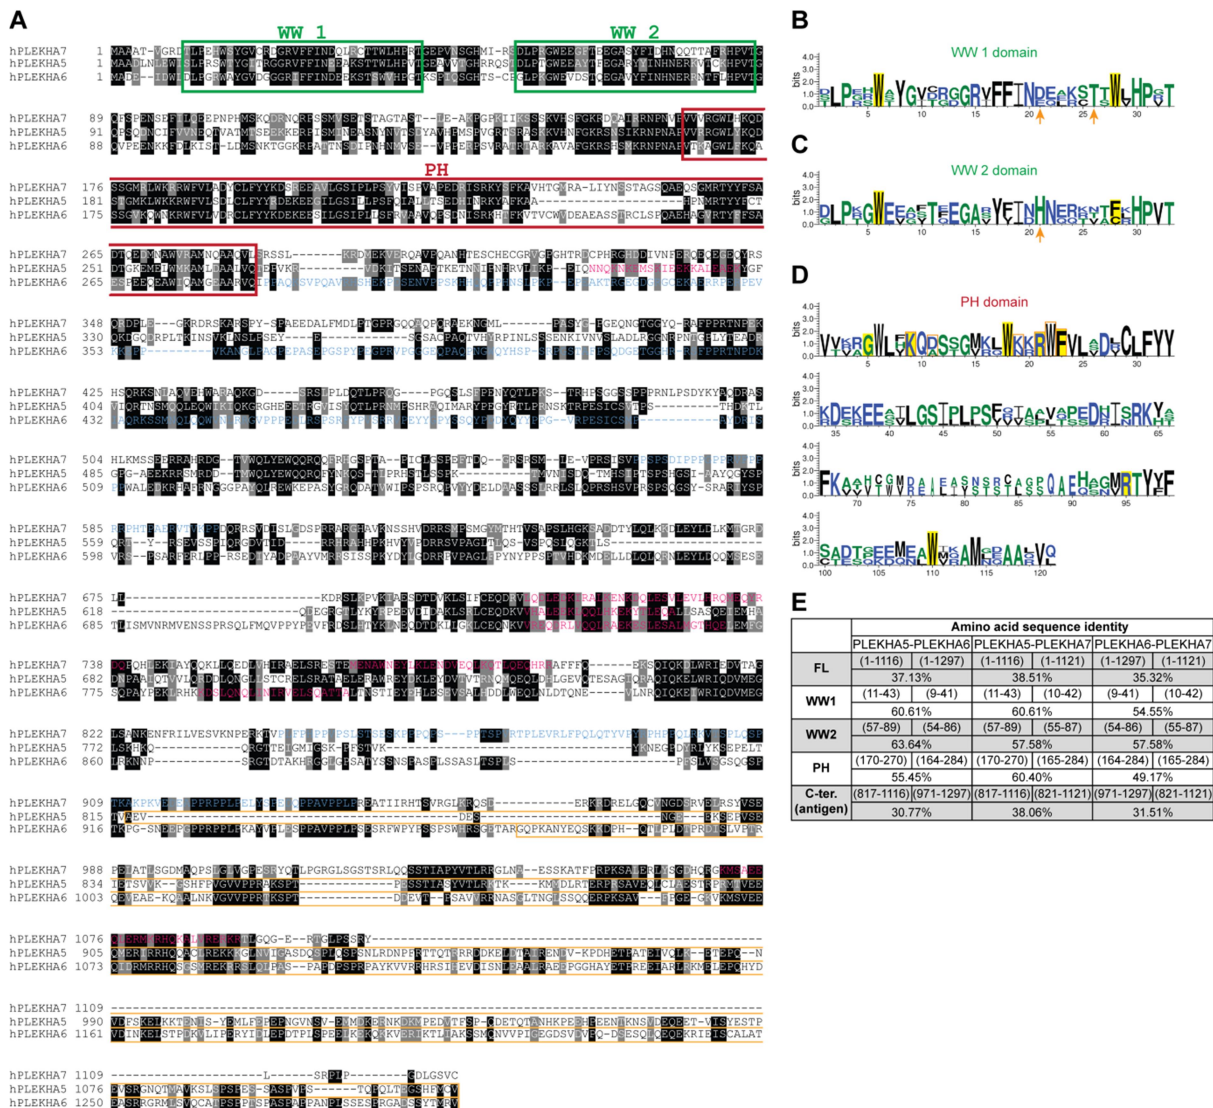

Figure S1

**Figure S1. Sequence homology between PLEKHA5, PLEKHA6 and PLEKHA7.** (A) Multiple sequence alignment of human PLEKHA5, PLEKHA6 and PLEKHA7 showing identical (black) and similar (grey) residues. WW and PH domains are in green and red boxes, respectively. Residues of coiled-coil and proline-rich domains are indicated in pink and blue, respectively. Orange boxes show regions used as antigens for generation of antibodies. (B-D) Weblogo diagrams of residue conservation in the first (B) and second (C) WW domains, and in the PH domain (D) of human PLEKHA5, PLEKHA6 and PLEKHA7. In B and C, signature residues of the WW domains are highlighted in yellow, and arrows point the amino acids forming the pocket for interaction with PDZD11 (Rouaud *et al.*, 2020). In D, the residues that make up the putative PtdIns(3,4,5)P3-binding motif (PPBM) (Isakoff *et al.*, 1998;

Dowler *et al.*, 2000) are highlighted in yellow, and the key amino acids for the PtdIns(3,4,5)P3 binding PH motif are squared in orange (Jungmichel *et al.*, 2014). (E) Percentage values of amino acid sequence identity between full-length and domains (with indicated amino acid positions) of WW- PLEKHAs.

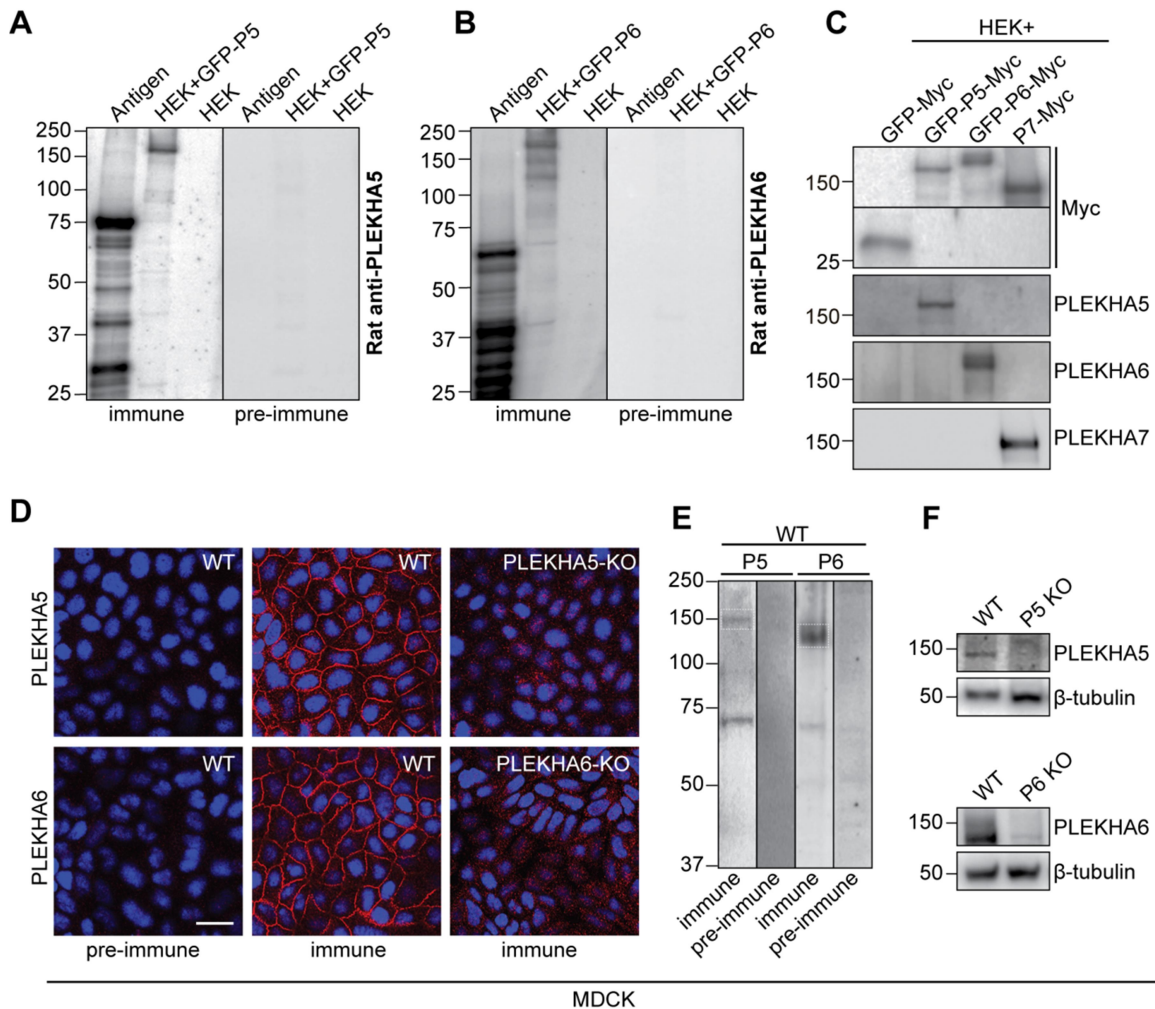

Figure S2

**Figure S2. Generation and validation of antibodies against PLEKHA5 and PLEKHA6.** (A-B) IB analysis, using anti-PLEKHA5 (A) or anti-PLEKHA6 (B) immune and pre-immune sera, of the respective antigen and of HEK cell lysates expressing the corresponding full-length protein (untransfected HEK lysate as negative control). (C) IB analysis of HEK lysates overexpressing GFP- and Myc-tagged PLEKHA5 (P5), PLEKHA6 (P6) or PLEKHA7 (P7) (GFP-Myc as control), using anti-PLEKHA5, -PLEKHA6 and -PLEKHA7 (-Myc as loading control) antibodies, showing the absence of cross-reaction. (D-F) IF microscopy (D) and IB analysis (E-F) of WT and KO MDCK cells (see Figure S4 for KO lines), using anti-PLEKHA5 (P5) or anti-PLEKHA6 (P6) immune and pre-immune sera. Bar= 20  $\mu$ m.  $\beta$ -tubulin serves as loading control.

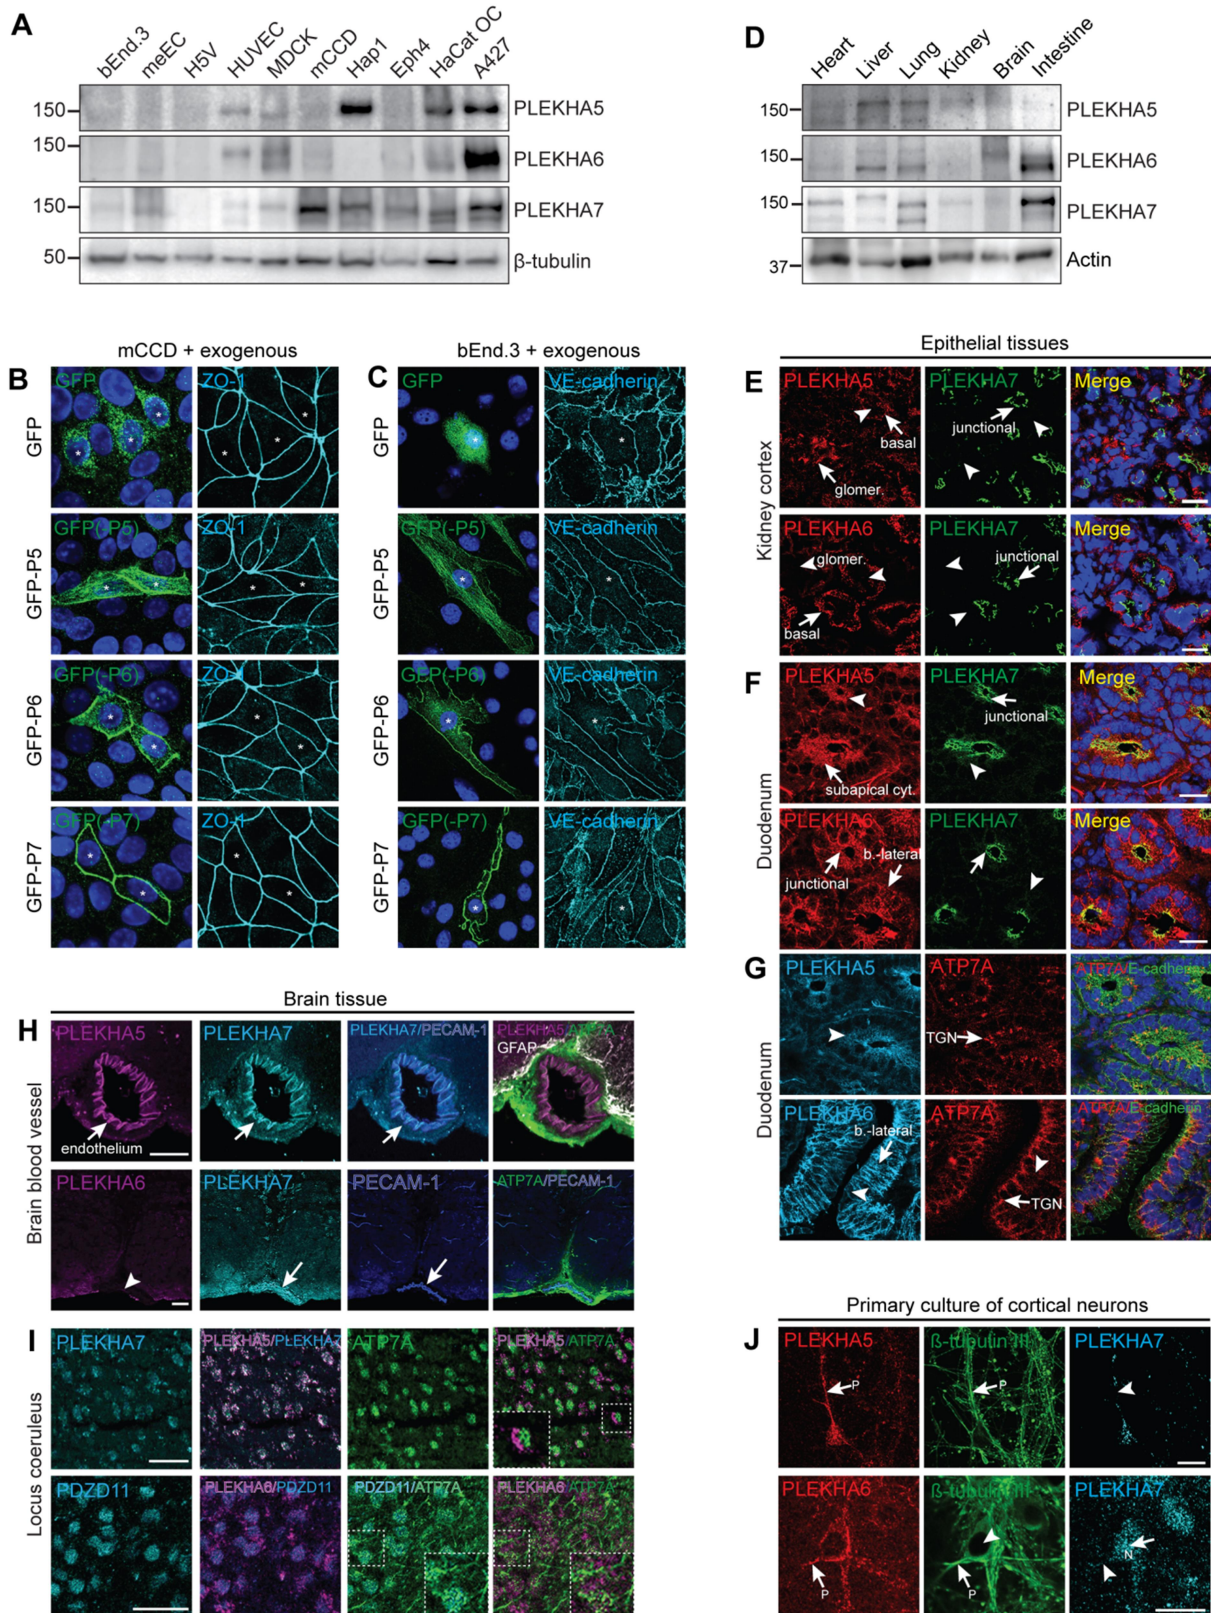

Figure S3

**Figure S3. Expression and localization of PLEKHA5, PLEKHA6 and PLEKHA7 in tissues and cells.** (A, D) IB analysis of PLEKHA5, PLEKHA6 and PLEKHA7 (with either  $\beta$ -tubulin or actin as loading controls) in lysates of the indicated cell types (A) and mouse tissues (D). (B, C) IF microscopy analysis of GFP-tagged exogenously expressed PLEKHA5 (P5), PLEKHA6 (P6) and PLEKHA7 (P7) (GFP as control) either in epithelial mCCD (B) or endothelial bEnd.3 cells (C). Asterisks show transfected cells. (E-G) IF microscopy analysis of the localization of WW-PLEKHAs and ATP7A (indicated in each panel) in sections of mouse kidney cortex (E) and duodenum (F, G). Basal, baso-lateral (b.-lateral), junctional, glomerular (glomer.), sub-apical cytoplasmic (sub-apical cyt.) or trans-Golgi network (TGN) labeling is indicated by arrows. Arrowheads indicate low/undetectable labeling. Bars= 20  $\mu$ m. (H-I) IF microscopy of mouse brain sections focusing on blood vessels (PECAM-1 as endothelial marker (blood vessels)) (H) or locus coeruleus (I). All WW-PLEKHAs and PDZD11 are expressed in neurons in locus coeruleus region, and ATP7A expression in locus coeruleus neurons appears as puncta. Bars= 50  $\mu$ m. (J) IF microscopy analysis of WW-PLEKHAs in primary cultures of cortical neurons, co-labeled with anti- $\beta$ -tubulin III to identify neuronal projections (pointed with P). N shows nucleus, arrows indicate labeling, arrowheads indicate low/undetectable labeling. Bars= 20  $\mu$ m.

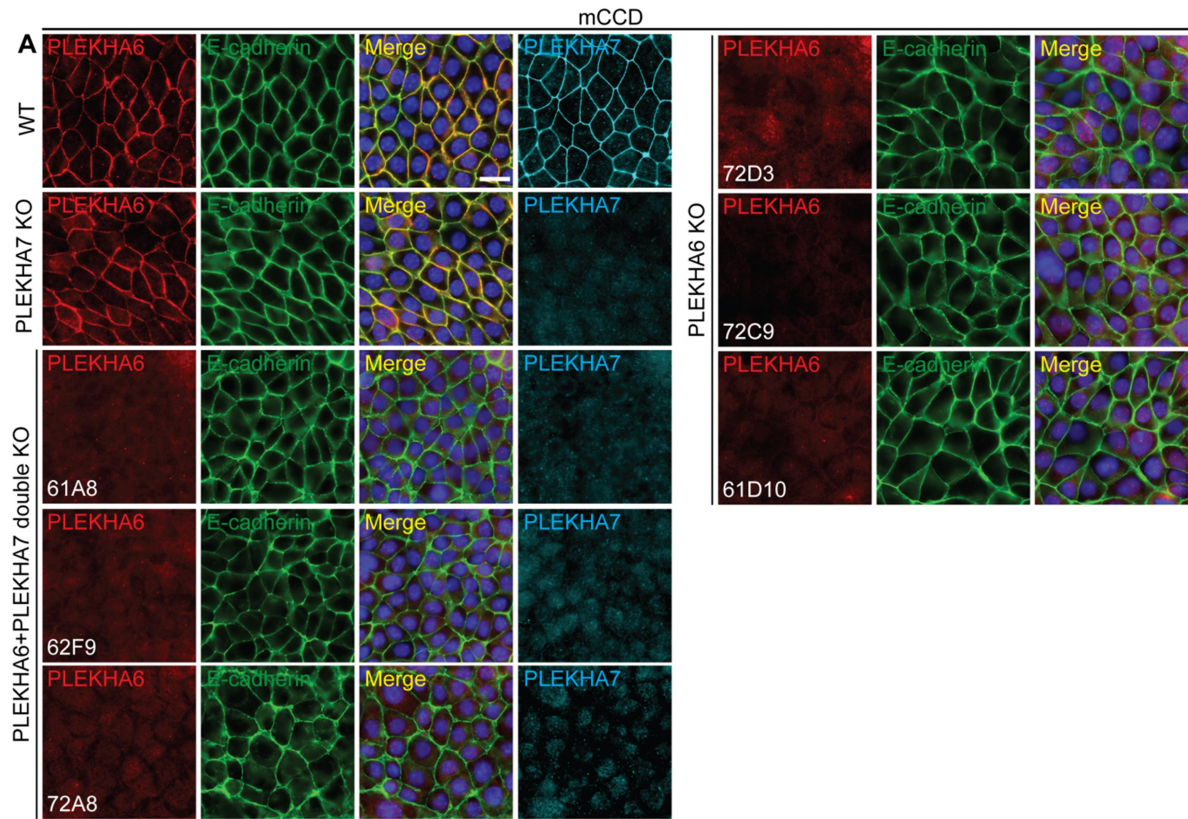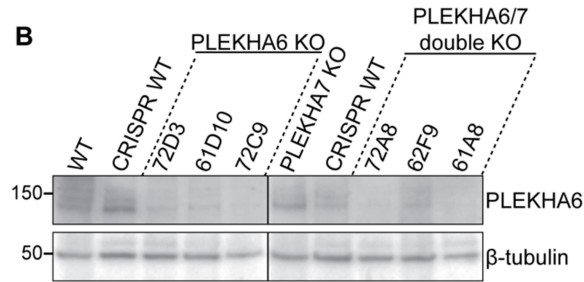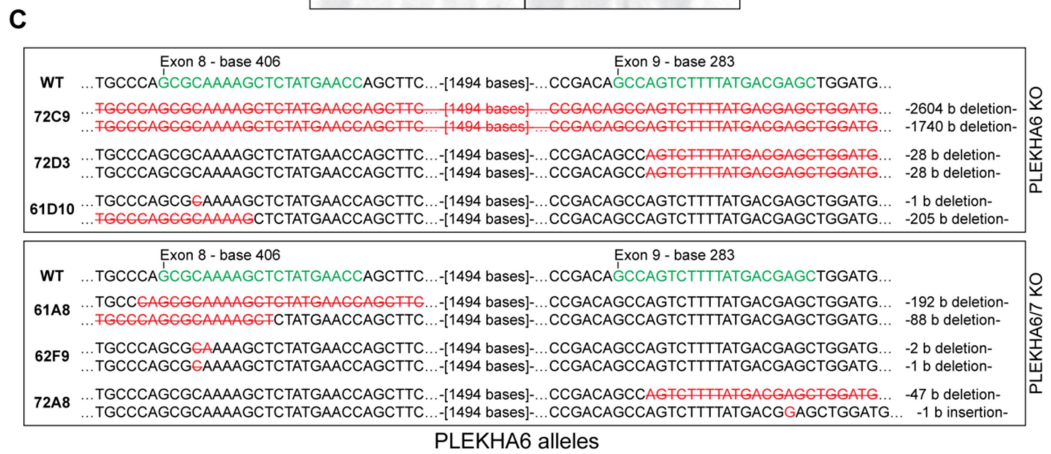

Figure S4-1

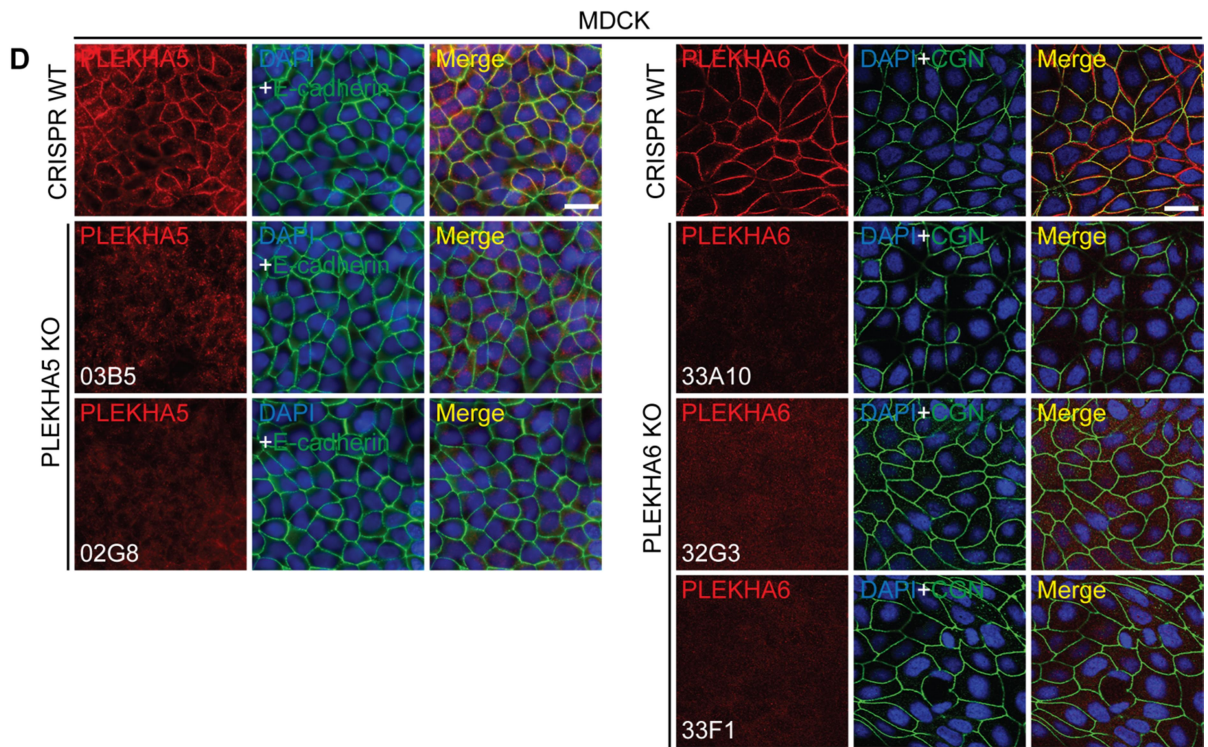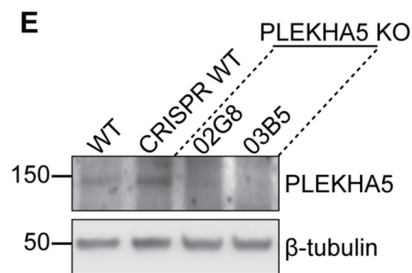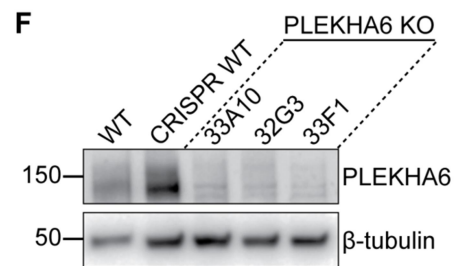

**G**

PLEKHA6 alleles

|       | Exon 11 - base 111                              |                                                              |                                     |
|-------|-------------------------------------------------|--------------------------------------------------------------|-------------------------------------|
| WT    | .....GAACCAGCTC                                 | ATCAACATTCGGGTGGAGCTGTCCC...                                 |                                     |
| 33A10 | .....GAACCAGCTC <b>CG</b><br>-[135b]-TCTTCAGTTC | ATCAACATTCGGGTGGAGCTGTCCC...<br>ATCAACATTCGGGTGGAGCTGTCCC... | -2 b deletion-<br>-143 b insertion- |
| 32G3  | .....GAACCAGCTCTC-[108b]-GC                     | ATCAACATTCGGGTGGAGCTGTCCC...                                 | -112 b insertion-                   |
|       | .....GAACCAGCTCTC-[108b]-GC                     | ATCAACATTCGGGTGGAGCTGTCCC...                                 | -112 b insertion-                   |
| 33F1  | .....GAACCAGCTCC-[34b]-TC                       | ATCAACATTCGGGTGGAGCTGTCCC...                                 | -38 b insertion-                    |
|       | .....GAACCAGCTCC-[34b]-TC                       | ATCAACATTCGGGTGGAGCTGTCCC...                                 | -38 b insertion-                    |

PLEKHA6 KO

Figure S4-2

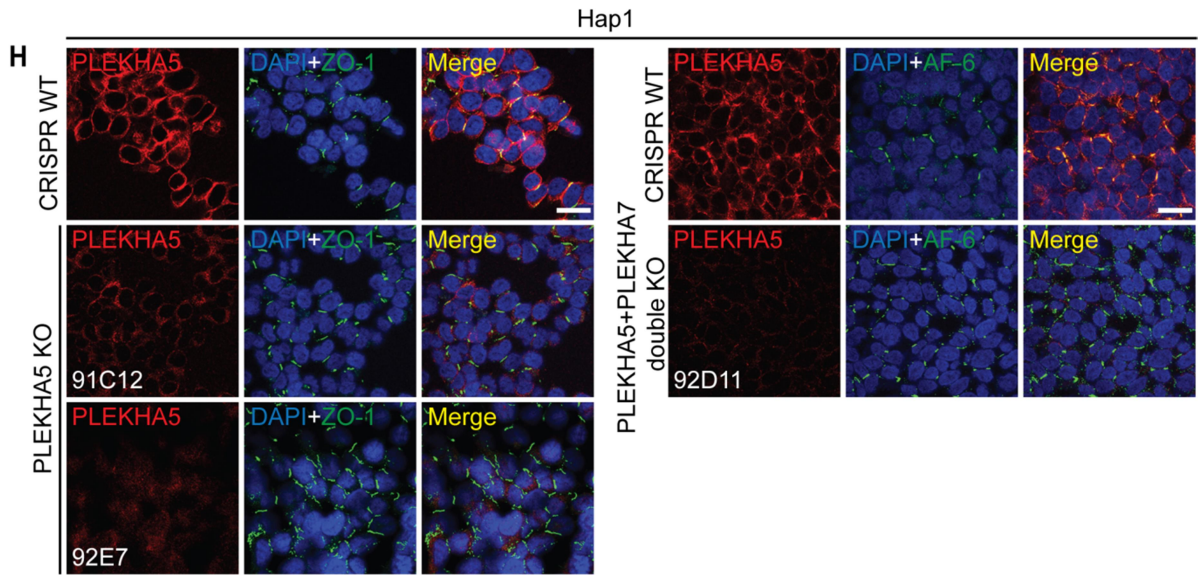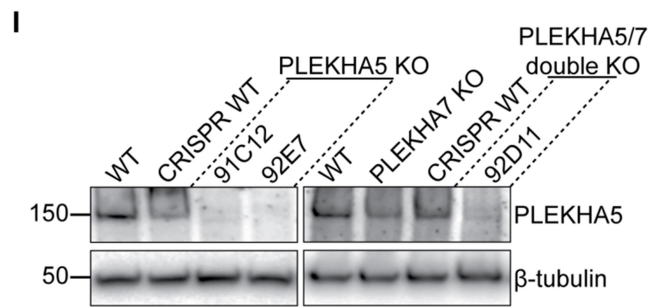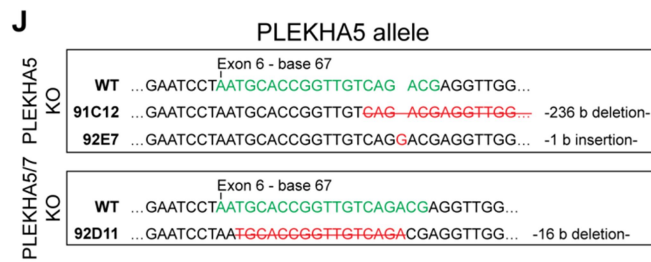

Figure S4-3



**Figure S4. Generation of single and double PLEKHA5, PLEKHA6 and PLEKHA7 knock-out cell lines.**

(A-C) Validation of CRISPR/Cas9-mediated deletion of PLEKHA6 in mCCD (either WT or PLEKHA7 KO background) by IF (A) and IB (B) analysis, and by genomic sequencing (C). E-cadherin is used as a junctional and lateral marker for internal reference in IF analysis. (D-G) Validation of CRISPR/Cas9-mediated deletion of either PLEKHA5 or PLEKHA6 in MDCK by IF microscopy (D) and IB (E, F) analysis and genotyping (G). Since full genomic sequence for dog PLEKHA5 is not available alleles for MDCK PLEKHA5 KO clones could not be genotyped. (H-J) Validation of CRISPR/Cas9-mediated deletion of PLEKHA5 in Hap1 (either WT or PLEKHA7 KO background) by IF microscopy (H) and IB (I) analysis, and by sequencing (J). Bars= 20  $\mu$ m. In C, G and J, CRISPR targets are depicted in green in the WT sequences, with their position in the exon, and respective indels in the alleles of the KO clones obtained are indicated in red.

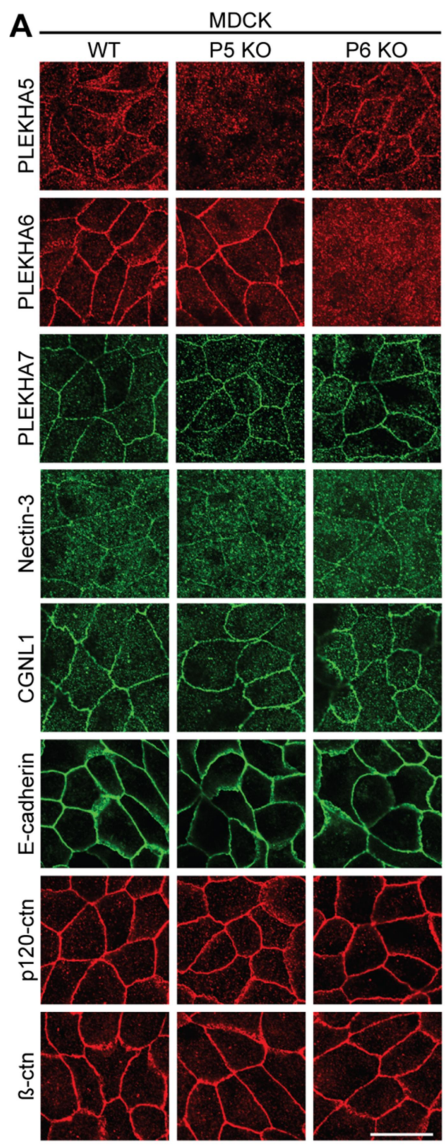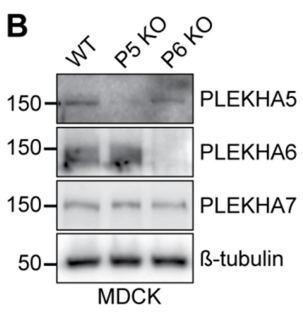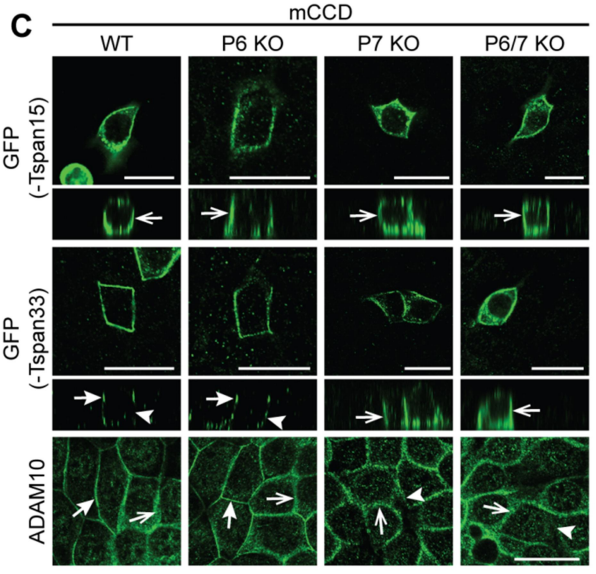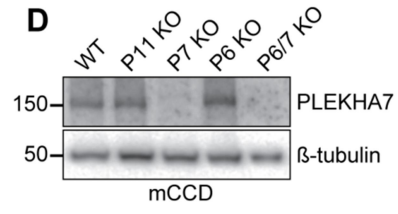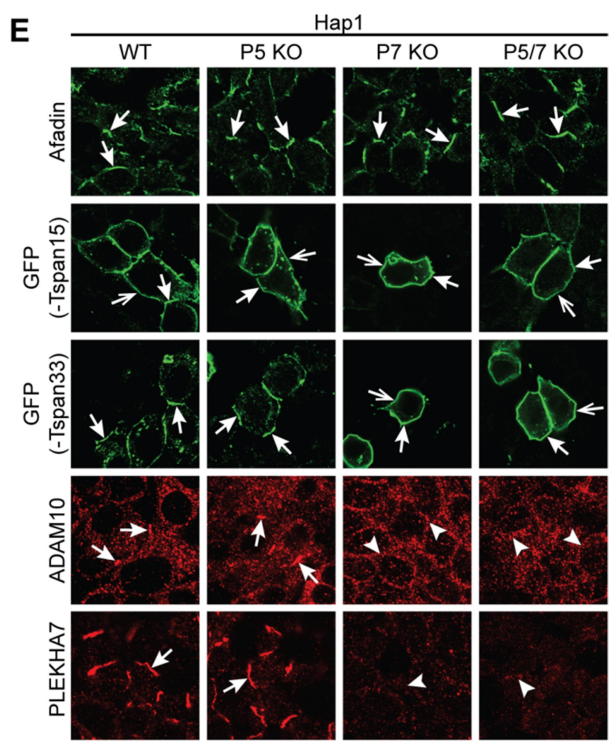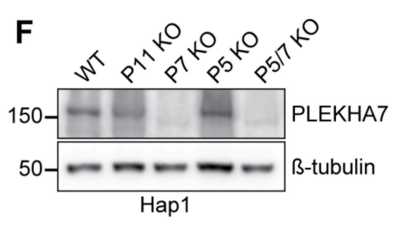

Figure S5

**Figure S5. Knock-out of PLEKHA5 or PLEKHA6 does not affect the localization of cadherin complex proteins, Tspan15, Tspan33, ADAM10 and PLEKHA7.** (A,C,E). IF microscopy analysis of the localizations of endogenous WW-PLEKHAs (A,E), nectin-3, paracingulin (CGNL1), E-cadherin, p120-catenin (ctn) and  $\beta$ -ctn (A), ADAM10 (C,E), afadin (E) and the exogenous TspanC8s Tspan33 and Tspan15 (C,E) in MDCK (A), mCCD (C) and Hap1 (E) WT and KO cells. Genotypes of KO cells are indicated on top of each column: P5=PLEKHA5, P6=PLEKHA6, P7=PLEKHA7. The phenotype of PDZD11-KO cells is identical to the phenotype of PLEKHA7-KO cells (Shah *et al.*, 2018). Images showing Z section (taken at the horizontal middle position of XY view) were from cells grown on Transwells. Arrows indicate labeling, arrowheads indicate low/undetectable labeling. Bars= 20  $\mu$ m. (B, D, F) IB analysis of the expression of WW-PLEKHAs in WT and KO cells: MDCK (B), mCCD (D) and Hap1 (F).

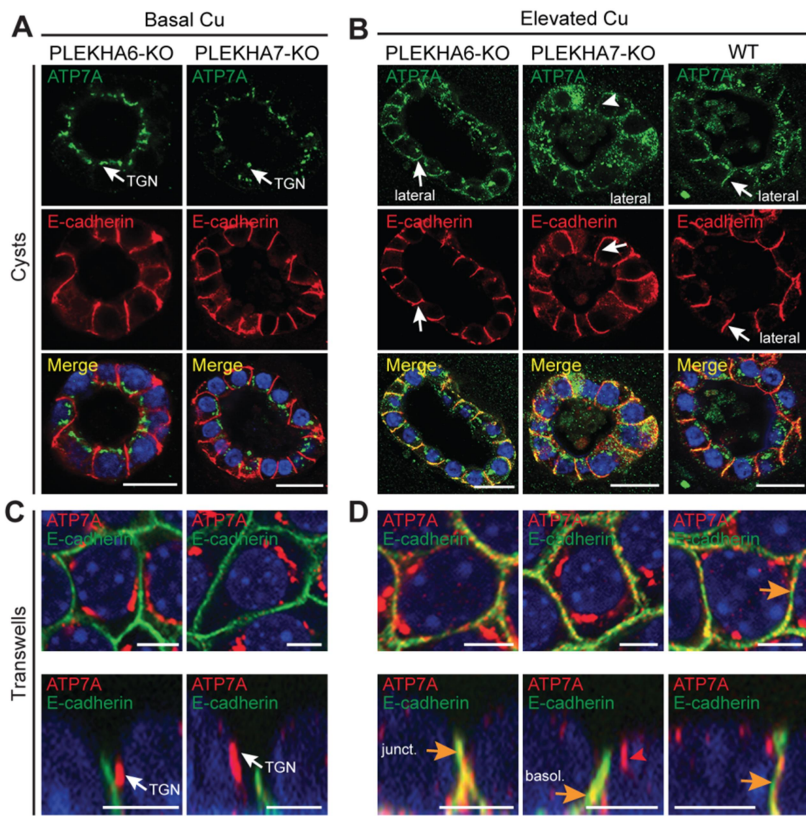

Figure S6-1

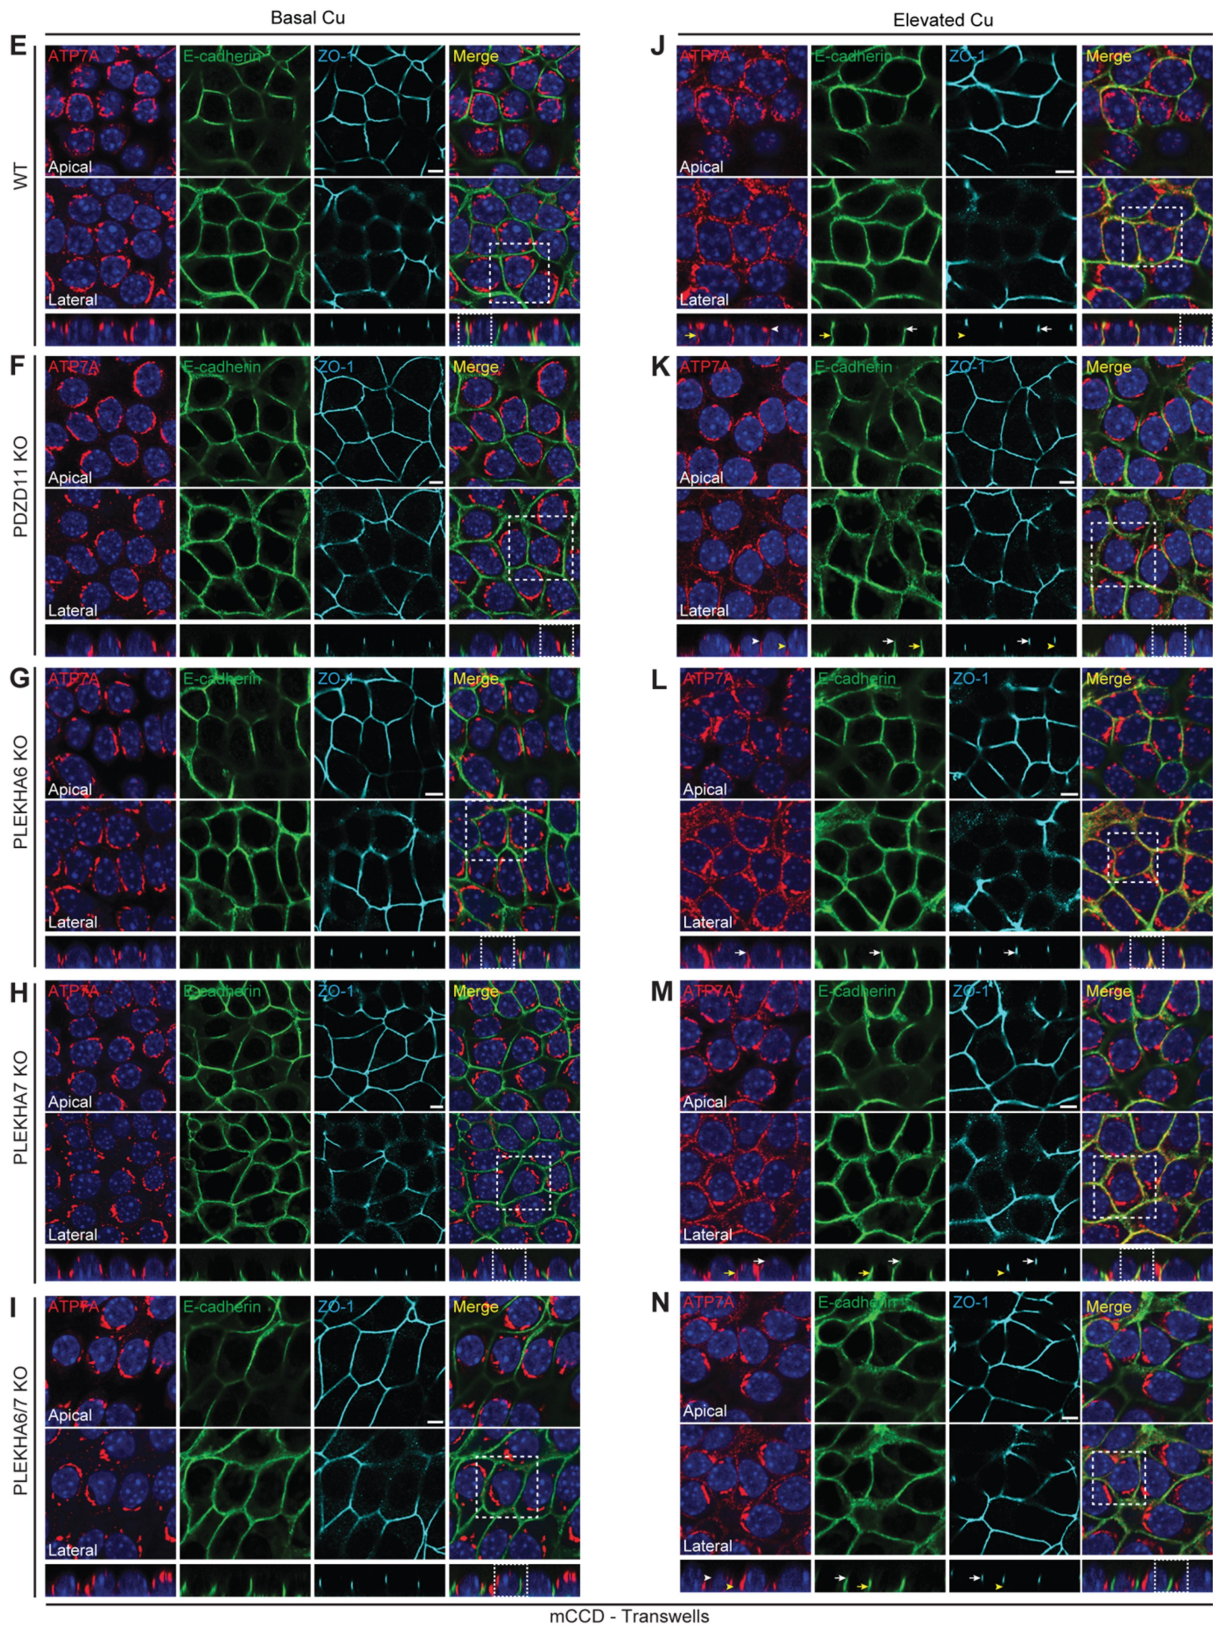

Figure S6-2

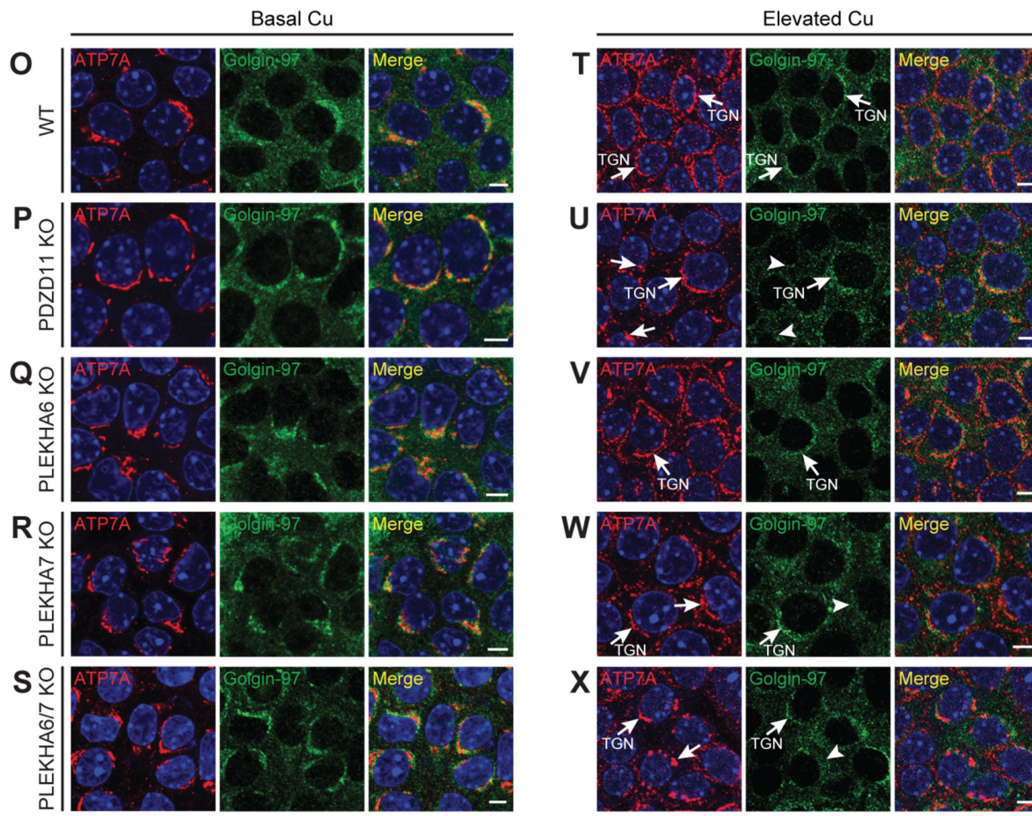

mCCD - Transwells

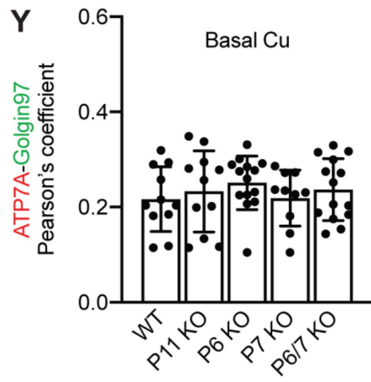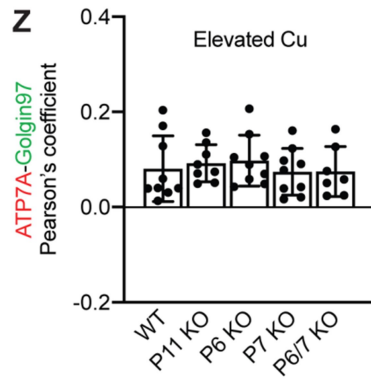

Figure S6-3

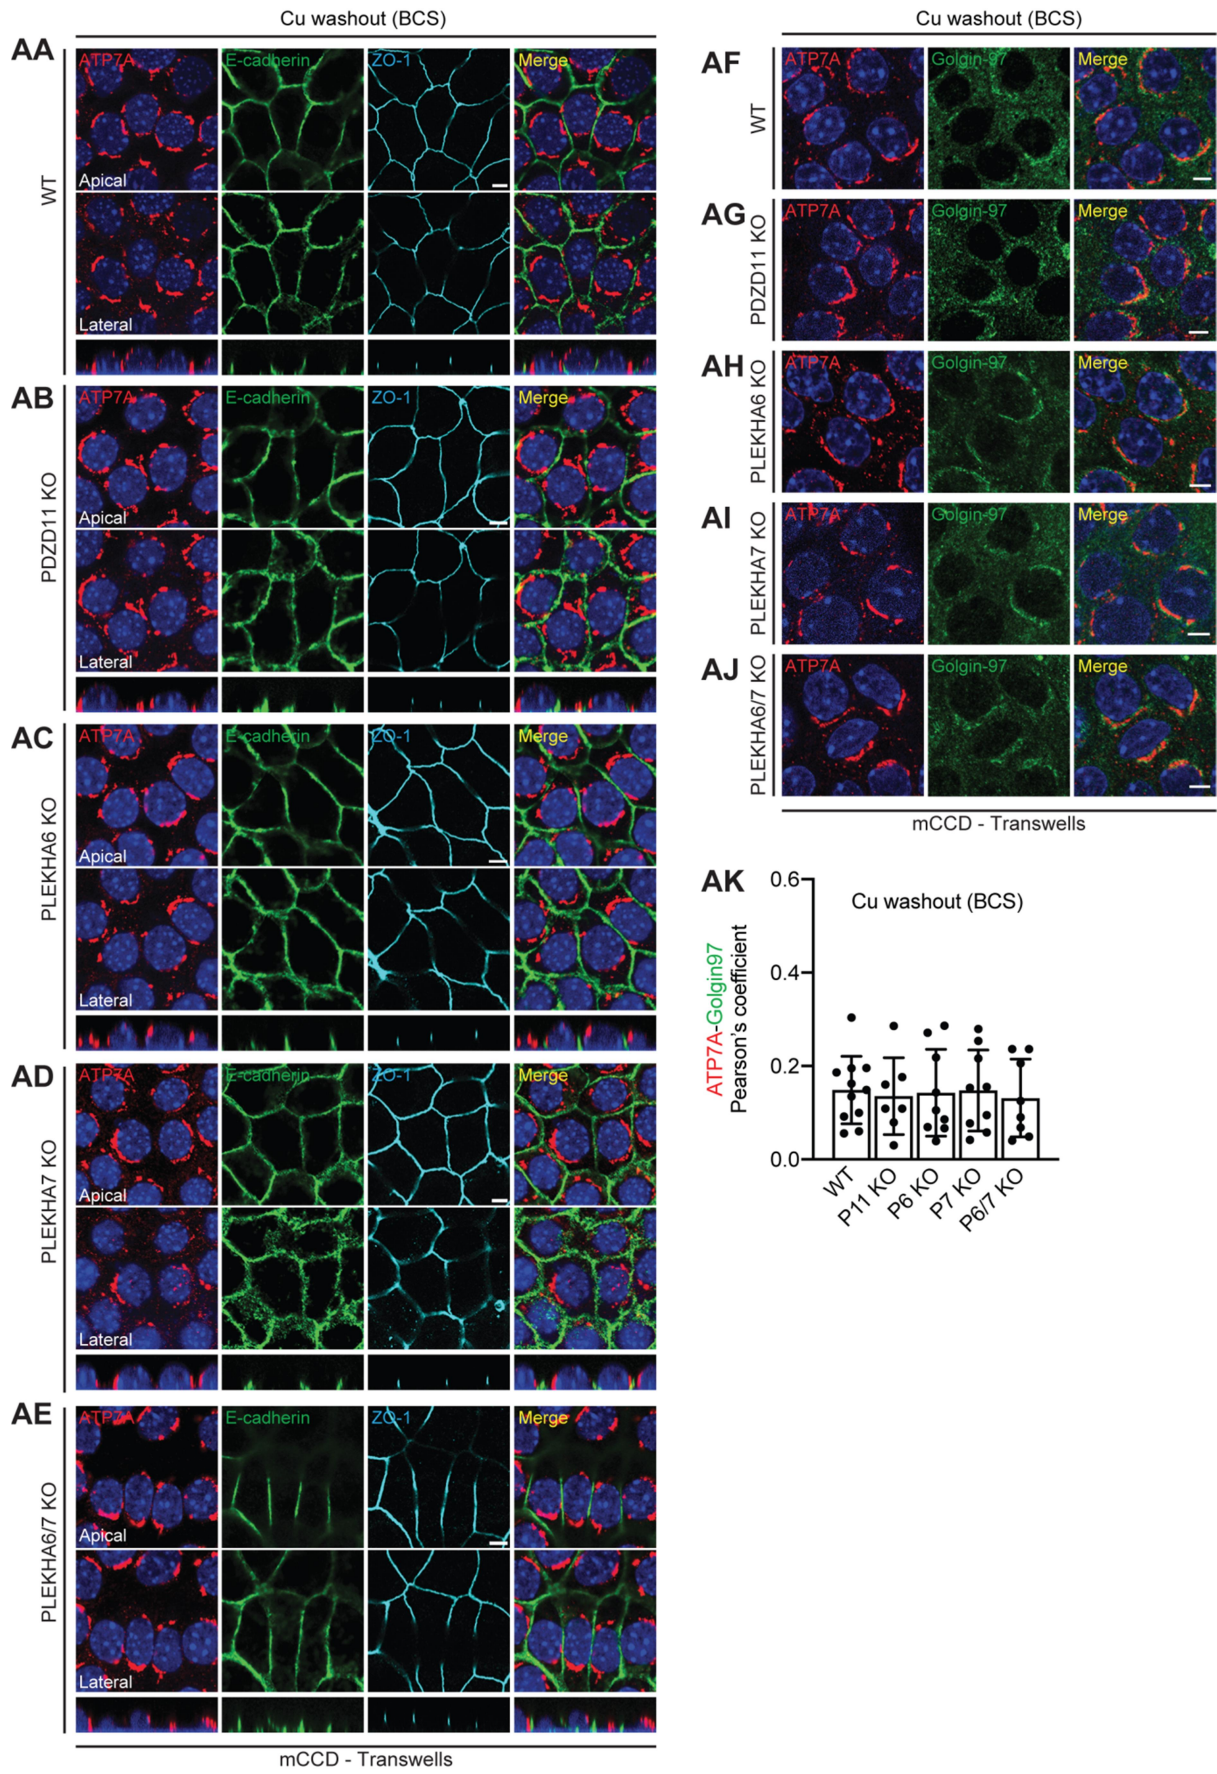

Figure S6-4

**Figure S6. Effect of KO of PDZD11 and of either single or double KO of PLEKHA6 and PLEKHA7 on the localization of ATP7A in mCCD cells.** (A-D) IF microscopy analysis of the localization of ATP7A in either PLEKHA6-KO or PLEKHA7-KO mCCD cysts (A-B) and monolayers polarized on Transwells (C-D) either under basal copper conditions (A, C) or in elevated copper (B, D). TGN= trans-Golgi network. Lateral, apical and basal ATP7A labeling in elevated copper are indicated by arrows (B). Arrowheads indicate low/undetectable labeling. Orange arrows and red arrowheads in D indicate ATP7A labeling colocalized and non-colocalized with E-cadherin, respectively. Bars= 20  $\mu\text{m}$  (A-B), 5  $\mu\text{m}$  (C-D). (E-N) IF microscopy analysis of the localization of ATP7A in polarized monolayers of mCCD cells (E, J=WT; F,K=PDZD11-KO; G,L=PLEKHA6-KO; H,M=PLEKHA7-KO; I,N=PLEKHA6-PLEKHA7 double KO) grown on Transwells under basal (E-I) or elevated (J-N) copper conditions. Dotted white squares/rectangles indicate high magnification areas shown in Figure 3 and in Figure S6C-D. (O-X) IF microscopy analysis of the localization of ATP7A and golgin-97 in polarized monolayers of mCCD cells (O, T=WT; P, U=PDZD11-KO; Q, V=PLEKHA6-KO; R, W=PLEKHA7-KO; S, X=PLEKHA6-PLEKHA7 double KO) grown on Transwells under basal (O-S) or elevated (T-X) copper conditions. (Y-Z) Quantification of the colocalization of ATP7A and golgin-97 using Pearson's correlation coefficient under either basal Cu (Y) or elevated Cu (Z). Dots show replicates corresponding to individual images from 3 independent experiments (n=10-14). Bars represent mean  $\pm$  SD and show no significant difference between WT and KO cells. (AA-AE) IF microscopy analysis of the localization of ATP7A in polarized monolayers of mCCD cells (AA=WT; AB=PDZD11-KO; AC=PLEKHA6-KO; AD=PLEKHA7-KO; AE=PLEKHA6-PLEKHA7 double KO) grown on Transwells treated with  $\text{CuCl}_2$  before copper washout (BCS chelation). (AF-AJ) IF microscopy analysis of the localization of ATP7A and golgin-97 in polarized monolayers of mCCD cells (AF=WT; AG=PDZD11-KO; AH=PLEKHA6-KO; AI=PLEKHA7-KO; AJ=PLEKHA6-PLEKHA7 double KO) grown on Transwells treated with  $\text{CuCl}_2$  before copper washout (BCS chelation). (AK) Quantification of the colocalization of ATP7A and golgin-97 using Pearson's correlation coefficient in cells grown on Transwells treated with  $\text{CuCl}_2$  before copper washout (BCS chelation). Dots show replicates corresponding to individual images from 3 independent experiments (n=7-9). Bars represent mean  $\pm$  SD and show no significant difference between WT and KO cells. For XY analysis (E-N, AA-AE), a more apical and a more basal plane of focus were imaged, using ZO-1 and E-cadherin as markers for apical junctions and lateral contacts, respectively. Merge images show colocalization between either E-cadherin and ATP7A (A-N, AA-AE) or golgin-97 and ATP7A (O-X, AF-AJ). ATP7A labeling is detected in the TGN in all cells in basal Cu conditions and is targeted to different degrees to the cell periphery in KO cells. Copper washout resulted in the return of ATP7A to the Golgi in all cells. Bars= 5  $\mu\text{m}$ .



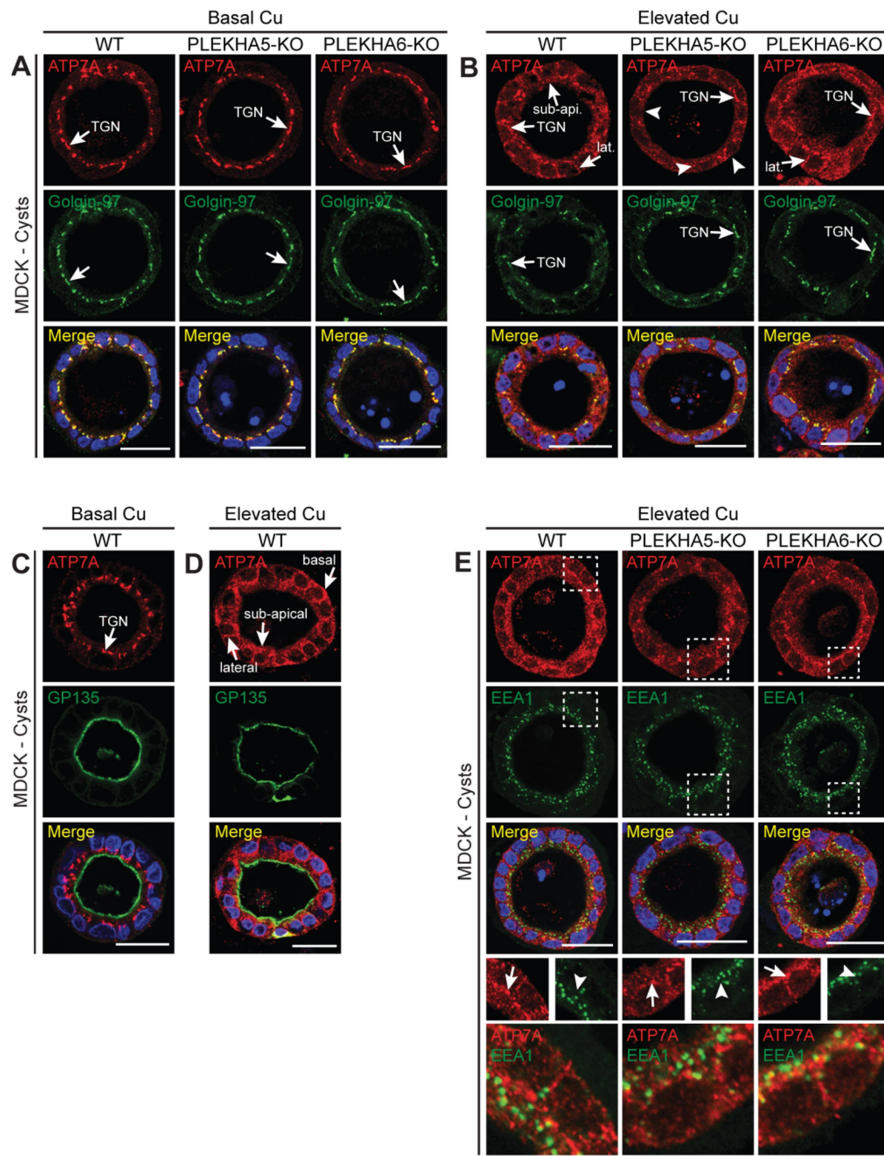

Figure S7-1

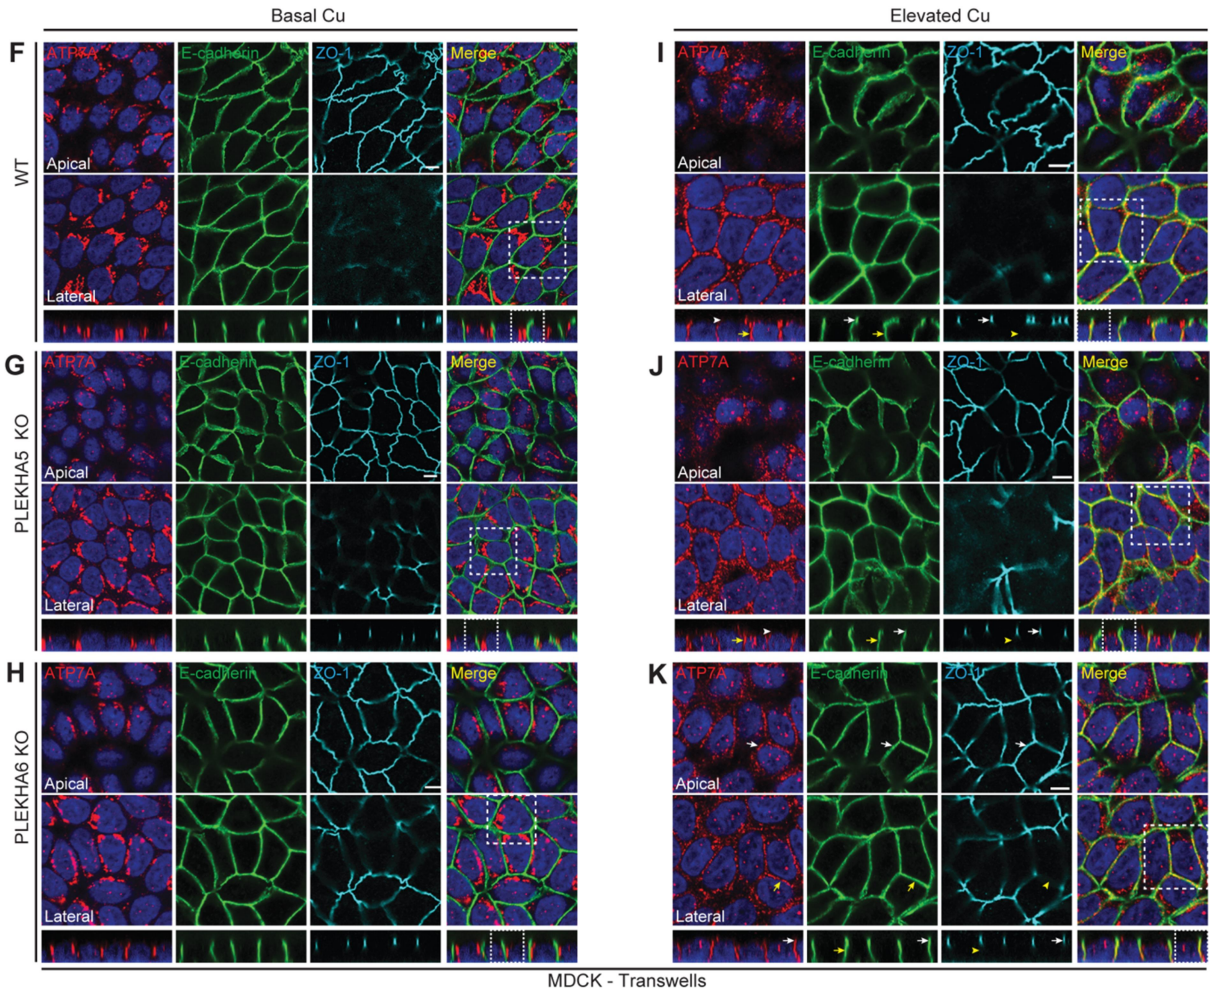

Figure S7-2

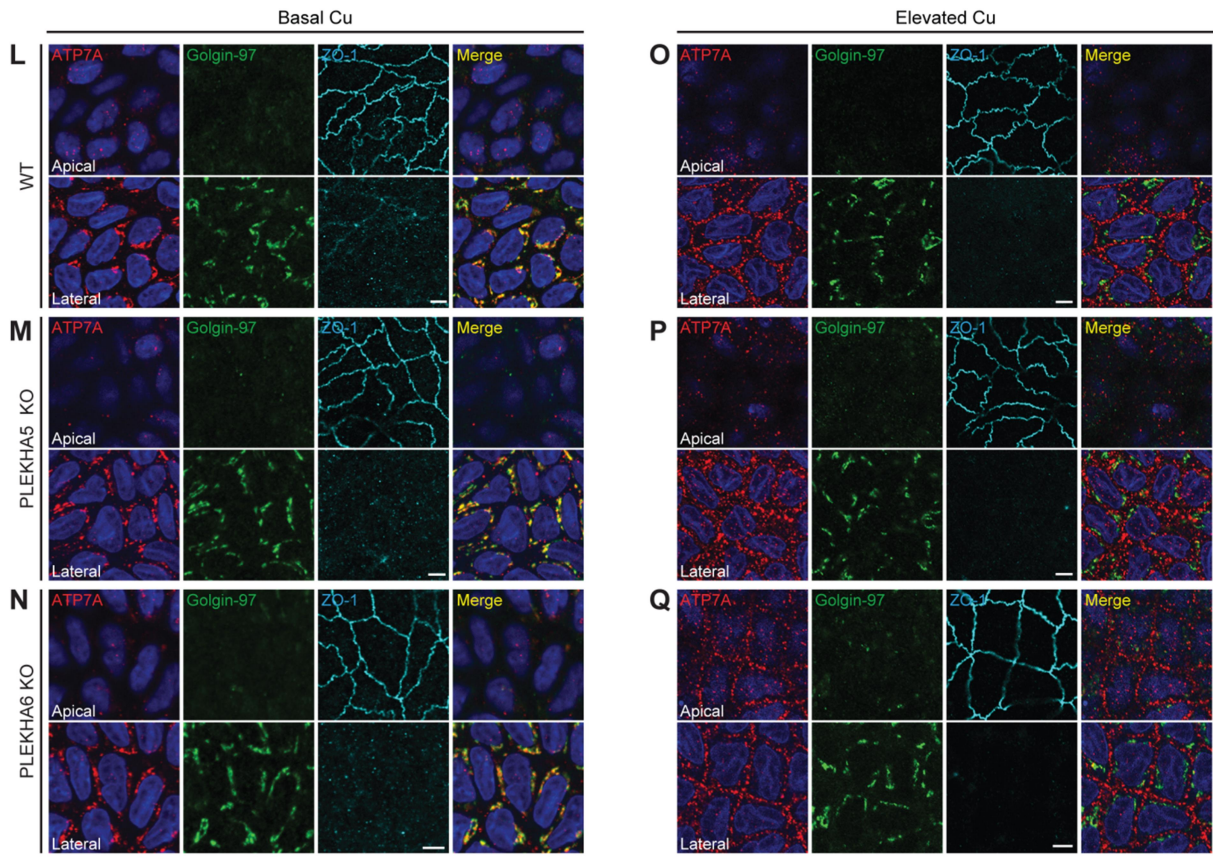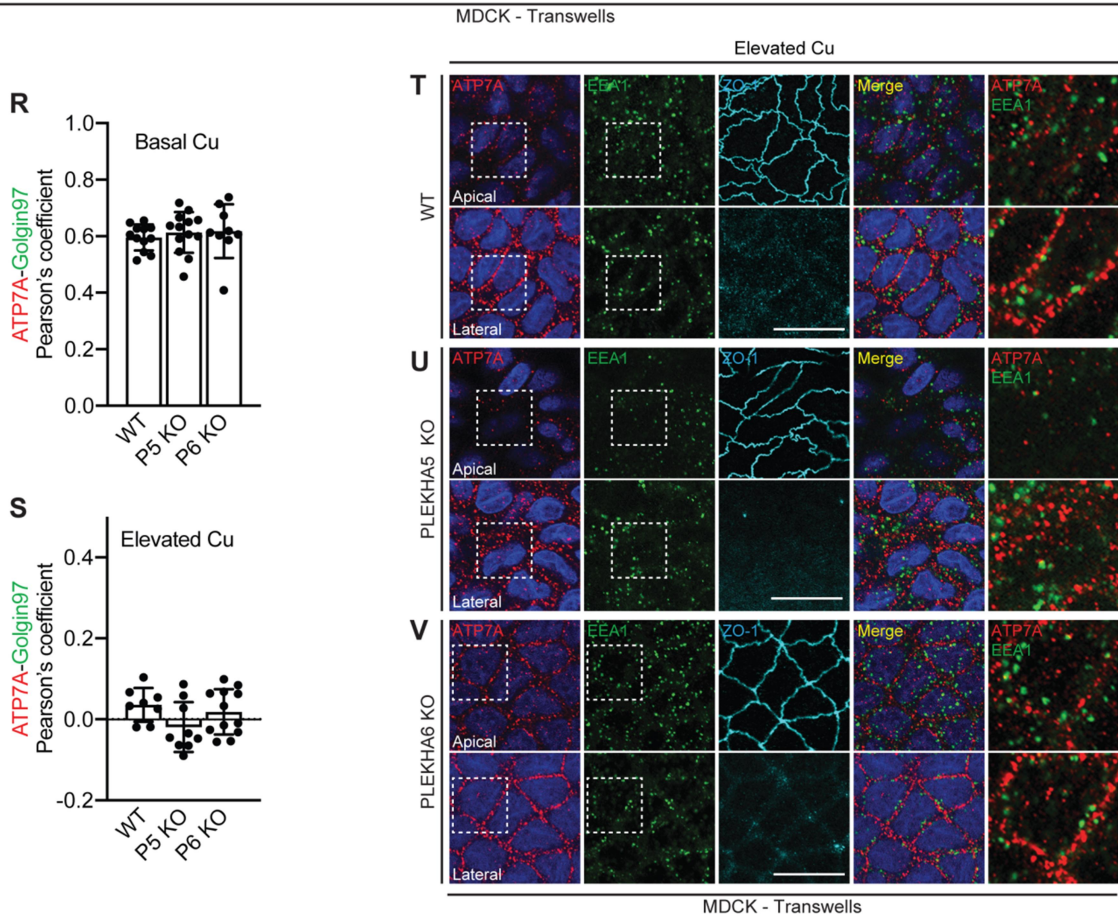

Figure S7-3

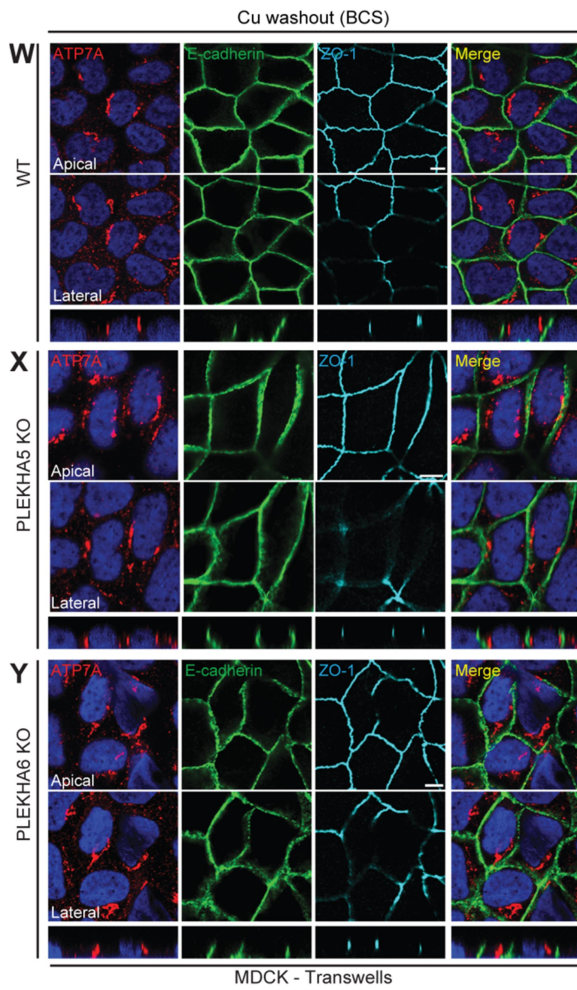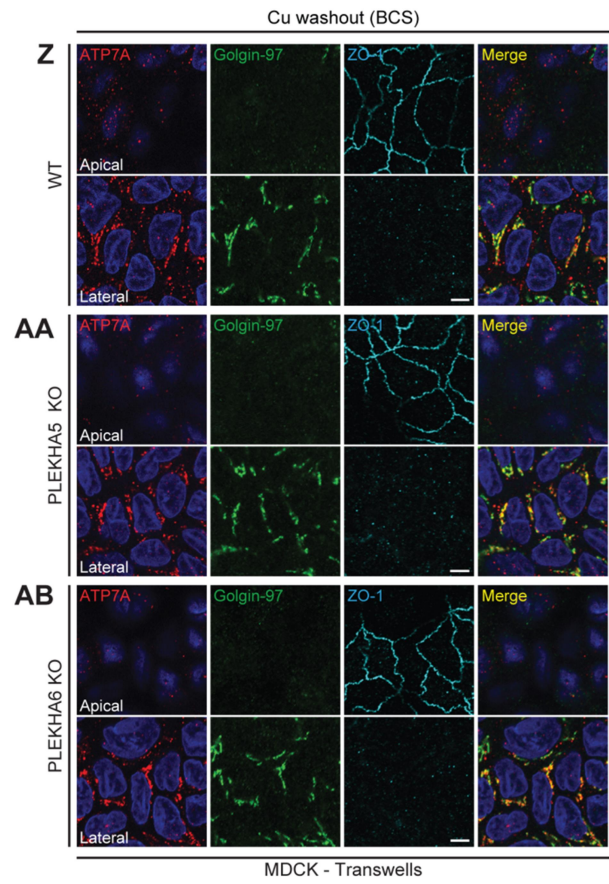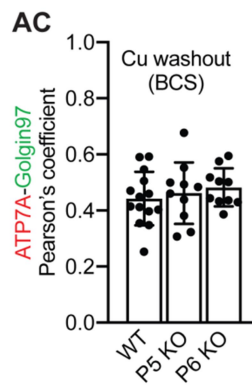

Figure S7-4

**Figure S7. Effect of KO of either PLEKHA5 or PLEKHA6 on the localization of ATP7A in polarized MDCK cells.** (A-E) IF microscopy analysis of the localization either of ATP7A (red) and TGN marker golgin-97 (green) (A-B) or of ATP7A and apical membrane marker GP135 (C-D), or of ATP7A and early endosome marker EEA1 (E) in MDCK cysts either under Basal Cu (A, C), or elevated Cu (B, D, E). Arrows indicate TGN, lateral (lat.), sub-apical, basal labeling. Arrowheads indicated low/undetectable labeling. Areas in dashed white squares are shown at higher magnification in bottom panels in (E). Bars= 20  $\mu\text{m}$ . (F-K) IF microscopy analysis of the localization of ATP7A in polarized monolayers of MDCK cells (F, I=WT; G, J=PLEKHA5-KO; H, K=PLEKHA6-KO) grown on Transwells under basal (F-H) or elevated (I-K) copper conditions. Dotted white squares/rectangles indicate high magnification areas shown in Figure 4. Bars= 5  $\mu\text{m}$ . (L-Q) IF microscopy analysis of the localization of ATP7A and golgin-97 in polarized monolayers of MDCK cells (L, O=WT; M, P=PLEKHA5-KO; N, Q=PLEKHA6-KO) grown on Transwells under basal (L-N) or elevated (O-Q) copper conditions. Bars= 5  $\mu\text{m}$ . (R-S) Quantification of the colocalization of ATP7A and golgin-97 using Pearson's correlation coefficient under either basal Cu (R) or elevated Cu (S). Dots show replicates corresponding to individual images from 3 independent experiments (n=8-13). Bars represent mean  $\pm$  SD and show no significant difference between WT and KO cells. (T-V) IF microscopy analysis of the localization of ATP7A (red) and early endosome marker EEA1 (green) in MDCK grown on Transwells under elevated Cu. Areas in dashed white squares are shown at higher magnification in panels on the right. Bars= 20  $\mu\text{m}$ . (W-Y) IF microscopy analysis of the localization of ATP7A in polarized monolayers of MDCK cells (W=WT; X=PLEKHA5-KO; Y=PLEKHA6-KO) grown on Transwells treated with  $\text{CuCl}_2$  before copper washout (chelation with BCS). Bars= 5  $\mu\text{m}$ . (Z-AB) IF microscopy analysis of the localization of ATP7A (red) and TGN marker golgin-97 (green) in MDCK cells (Z=WT, AA= PLEKHA5 KO, AB=PLEKHA6 KO) grown on Transwells treated with  $\text{CuCl}_2$  before copper washout (chelation with BCS). Bars= 5  $\mu\text{m}$ . (AC) Quantification of the colocalization of ATP7A and golgin-97 using Pearson's correlation coefficient. Dots show replicates corresponding to individual images from 3 independent experiments (n=10-14). Bars represent mean  $\pm$  SD and show no significant difference between WT and KO cells. For XY analysis (F-Q, T-AB), a more apical and a more basal plane of focus were imaged, using ZO-1 and E-cadherin as markers for apical junctions and lateral contacts, respectively. Merge images show colocalization between E-cadherin and ATP7A (F-K, W-Y) or golgin-97 and ATP7A (L-Q, Z-AB) or EEA1 and ATP7A (T-V). ATP7A labeling is detected in the TGN in all cells in basal Cu conditions and is targeted to different degrees to the cell periphery in cells KO for either PLEKHA5 or PLEKHA6. Copper washout resulted in the return of ATP7A to the Golgi in all cells.

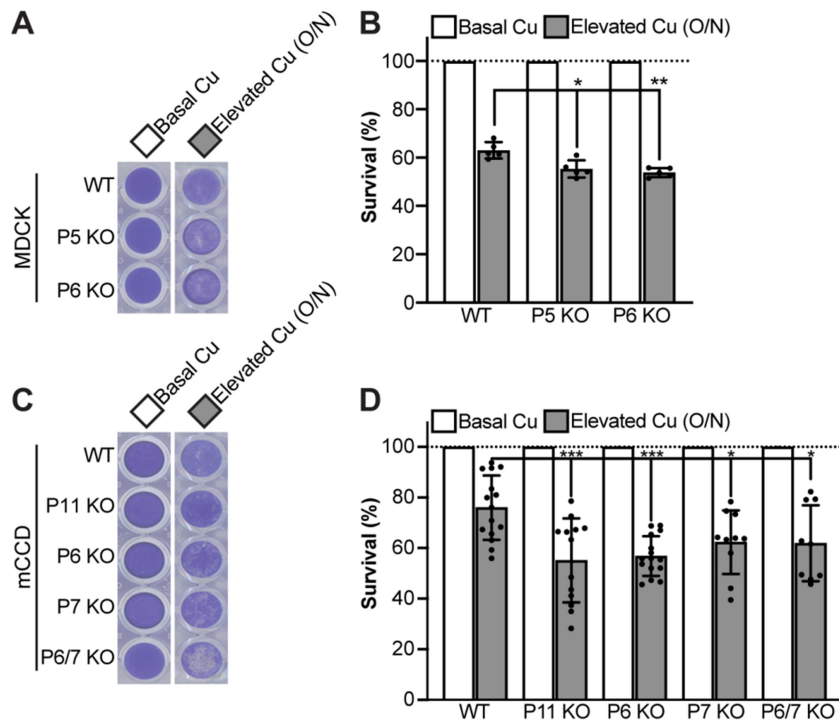

Figure S8

**Figure S8. PDZD11 and WW-PLEKHAs are required for cell survival under elevated copper conditions.** (A, C) Images of cell culture wells after staining with crystal violet of the indicated WT and KO MDCK (A) and mCCD (C) cells under basal copper (left columns) and elevated copper (right column) conditions. (B, D) Quantification of cell survival, based on crystal violet assay, of each clonal line, either under basal (white columns) or elevated (grey columns) copper. Absorbances are normalized to the basal copper level condition of the corresponding genotype. Dots show replicates ( $n=4$  in B,  $n=9-15$  in D) and bars represent mean  $\pm$  SD. One-way ANOVA with post hoc Dunnett's test ( $*p<0.05$ ,  $**p<0.01$ ,  $***p<0.001$ ). Abbreviations for genotypes: P11=PDZD11; P5=PLEKHA5, P6=PLEKHA6; P7=PLEKHA7.

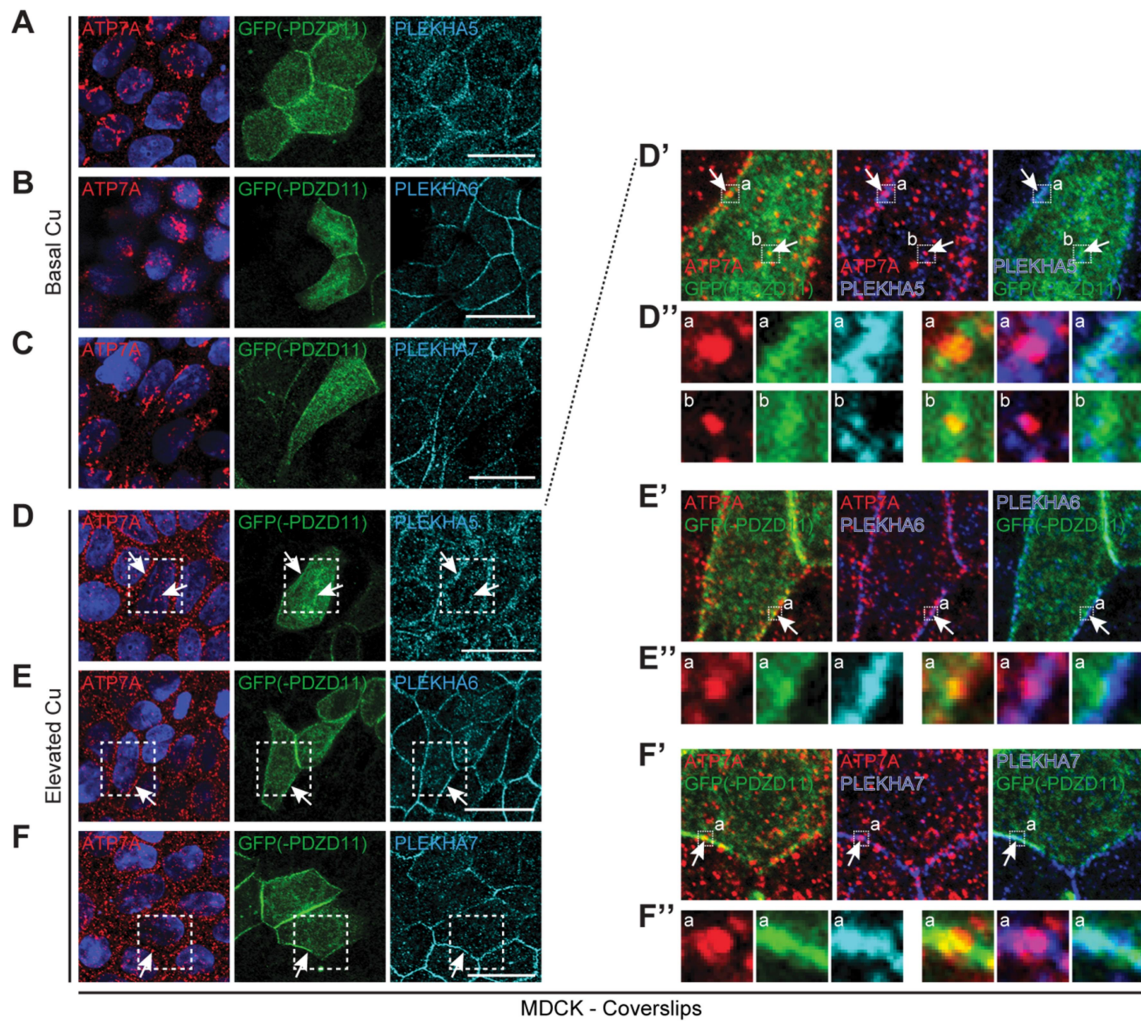

Figure S9

**Figure S9. ATP7A, PDZD11 and WW-PLEKHAs colocalize in elevated copper conditions.** (A-F) IF microscopy analysis of the localization of endogenous ATP7A (red) and WW-PLEKHAs (cyan) and of exogenous GFP-tagged PDZD11 (green) in MDCK cells grown on glass coverslips, under basal (A-C) or elevated (D-F) copper conditions. (D'-F') are enlarged merged images of dashed squares indicated in (D-F) (WW-PLEKHAs in blue). (D''-F'') are enlarged images of dashed squares indicated in (D'-F'). Arrows indicate labeling, arrowheads indicate low/undetectable labeling. Bars= 20  $\mu\text{m}$  (A-F).

**Supplementary Table 1. Summary of localization of WW-PLEKHAs and PDZD11 in cultured cells and tissues.**

|                                            | <b>PLEKHA5</b>                                                  | <b>PLEKHA6</b>                                     | <b>PLEKHA7</b>                                | <b>PDZD11</b>                                                           |
|--------------------------------------------|-----------------------------------------------------------------|----------------------------------------------------|-----------------------------------------------|-------------------------------------------------------------------------|
| <b>mCCD cells</b>                          | <i>Not detected</i>                                             | Apical AJ and lateral contacts                     | Apical AJ                                     | Apical AJ (endog.)<br>Apical AJ, lateral contacts and cytoplasm (exog.) |
| <b>MDCK cells</b>                          | Lateral contacts and microtubules<br>(also sub-apical in cysts) | Apical AJ and lateral contacts                     | Apical AJ                                     | AJ                                                                      |
| <b>Hap1 cells</b>                          | AJ and cytoplasm                                                | <i>Not detected</i>                                | AJ                                            | AJ (Shah <i>et al.</i> , 2018)                                          |
| <b>bEnd. endothelial cells</b>             | AJ (weak) and cytoplasm (exog.)                                 | AJ and cytoplasm (weak) (exog.)                    | AJ                                            | <i>Not determined</i>                                                   |
| <b>Kidney cortex</b>                       | Glomeruli<br>Apical and basal surface epithelial cells          | Basal surface epithelial cells                     | Apical AJ epithelial cells                    | <i>Not determined</i>                                                   |
| <b>Duodenum</b>                            | Sub-apical cytoplasm of epithelial cells                        | Apical AJ and basolateral surface epithelial cells | Apical AJ epithelial cells                    | <i>Not determined</i>                                                   |
| <b>Brain tissue</b>                        | Endothelial cells<br>Neurons/glia cytoplasmic                   | Neurons/glia perinuclear                           | Endothelial cells<br>Neurons/glia cytoplasmic | Neurons/glia perinuclear                                                |
| <b>Locus coeruleus</b>                     | Neurons/glia cytoplasmic                                        | Neurons/glia cytoplasmic                           | Neurons/glia cytoplasmic                      | Neurons/glia perinuclear                                                |
| <b>Cortical neurons (primary cultures)</b> | Cytoplasm and neuronal projections                              | Cytoplasm and neuronal projections                 | Cytoplasm and nucleus                         | <i>Not determined</i>                                                   |

Based on data shown in Figure 2 and Figure S3.



## SUPPLEMENTARY KEY RESOURCES TABLE

| REAGENT or RESOURCE                           | SOURCE                                                       | IDENTIFIER                           |
|-----------------------------------------------|--------------------------------------------------------------|--------------------------------------|
| <b>Antibodies</b>                             |                                                              |                                      |
| Rabbit polyclonal anti-PLEKHA7                | Citi Laboratory<br>(Pulimeno <i>et al.</i> , 2010)           | Rb30388                              |
| Rabbit polyclonal anti-PDZD11                 | Citi Laboratory<br>(Guerrera <i>et al.</i> , 2016)           | Rb29958                              |
| Guinea pig polyclonal anti-PLEKHA7            | Citi Laboratory<br>(Guerrera <i>et al.</i> , 2016)           | GP2737                               |
| Mouse monoclonal anti- $\beta$ -tubulin       | Thermo Fisher Scientific                                     | Cat# 32-2600,<br>RRID: AB_2533072    |
| Mouse monoclonal anti- $\alpha$ -tubulin      | Thermo Fisher Scientific                                     | Cat# 32-2500,<br>RRID: AB_2533071    |
| Guinea pig monoclonal anti- $\alpha$ -tubulin | Geneva Antibody Facility<br>(Guerreiro and Meraldi,<br>2019) | AA345 scFv-F2C                       |
| Rabbit polyclonal anti-GFP                    | Thermo Fisher Scientific                                     | Cat# A-11122,<br>RRID: AB_221569     |
| Mouse monoclonal anti-GFP                     | Roche                                                        | Cat# 11814460001,<br>RRID: AB_390913 |
| Mouse monoclonal anti-HA                      | Thermo Fisher Scientific                                     | Cat# 32-6700,<br>RRID: AB_2533092    |
| Rabbit polyclonal anti-HA                     | Santa Cruz<br>Biotechnology                                  | Cat# sc-805,<br>RRID: AB_631618      |
| Mouse monoclonal anti-myc                     | Citi Laboratory                                              | 9E10                                 |
| Mouse monoclonal anti-E-cadherin              | BD Biosciences                                               | Cat# 610181,<br>RRID: AB_397580      |
| Mouse monoclonal anti-ZO-1                    | Thermo Fisher Scientific                                     | Cat# 33-9100,<br>RRID: AB_2533147    |
| Rat monoclonal anti-ZO-1                      | Goodenough Laboratory<br>(Harvard Medical<br>School)         | R40.76<br>RRID: AB_2205518           |
| Rabbit polyclonal anti-afadin                 | Sigma-Aldrich                                                | Cat# A0224,<br>RRID: AB_257871       |
| Rabbit polyclonal anti-paracingulin           | Citi Laboratory<br>(Pulimeno <i>et al.</i> , 2011)           | 20893                                |
| Rabbit polyclonal anti-paracingulin           | Citi Laboratory<br>(Guillemot <i>et al.</i> , 2008)          | n.821                                |
| Rabbit polyclonal anti-cingulin               | Citi Laboratory<br>(Cardellini <i>et al.</i> , 1996)         | C532                                 |
| Mouse monoclonal anti-p120catenin             | Reynolds Laboratory<br>(Wu <i>et al.</i> , 1998)             | 8D11                                 |
| Rabbit polyclonal anti- $\alpha$ -catenin     | Sigma-Aldrich                                                | Cat# C2081,<br>RRID: AB_476830       |
| Rabbit polyclonal anti- $\beta$ -catenin      | Sigma-Aldrich                                                | Cat# C2206,<br>RRID: AB_476831       |
| Rat monoclonal anti-nectin-3                  | MBL                                                          | Cat# D084-3,<br>RRID: AB_592587      |
| Mouse monoclonal anti-GP135                   | DSHB                                                         | Cat# 3F2/D8,<br>RRID: AB_2618385     |
| Rabbit polyclonal anti-ADAM10                 | Merck Millipore                                              | Cat# AB19026,<br>RRID: AB_2242320    |

|                                                                |                                                      |                                       |
|----------------------------------------------------------------|------------------------------------------------------|---------------------------------------|
| Mouse monoclonal anti-actin                                    | Merck Millipore                                      | Cat# MAB1501R,<br>RRID: AB_2223041    |
| Mouse monoclonal anti-GFAP                                     | Sigma-Aldrich                                        | Cat# G3893,<br>RRID: AB_477010        |
| Chicken polyclonal anti-GFAP                                   | Invitrogen/Thermo<br>Fisher Scientific               | Cat# 01-670-261<br>RRID: AB_1074620   |
| Mouse monoclonal anti-tubulin $\beta$ -III                     | BioLegend                                            | Cat# 801201,<br>RRID: AB_2313773      |
| Rabbit polyclonal anti-ATP7A                                   | Eipper Laboratory<br>(Steveson <i>et al.</i> , 2003) | RbCT78                                |
| Mouse monoclonal anti-ATP7A                                    | Santa Cruz<br>Biotechnology                          | Cat# sc-376467,<br>RRID: AB_1115048   |
| Rat polyclonal anti-PLEKHA5                                    | Citi Laboratory (This<br>paper)                      | RtSZR129                              |
| Rat polyclonal anti-PLEKHA6                                    | Citi Laboratory (This<br>paper)                      | RtSZR127                              |
| Armenian hamster monoclonal anti-PECAM-1                       | Merck Millipore                                      | Cat# MAB1398Z,<br>RRID: AB_94207      |
| Goat polyclonal anti-VE-cadherin                               | Santa Cruz<br>Biotechnology                          | Cat# sc-6458,<br>RRID: AB_2077955     |
| Mouse monoclonal anti-Golgin97                                 | Thermo Fisher Scientific                             | Cat# A-21270,<br>RRID: AB_221447      |
| Mouse monoclonal anti-EEA1                                     | BD Biosciences                                       | Cat# 610457,<br>RRID: AB_397830       |
| Alexa Fluor 488-AffiniPure Donkey anti-Rabbit IgG              | Jackson<br>ImmunoResearch                            | Cat# 711-545-152,<br>RRID: AB_2313584 |
| Alexa Fluor 488-AffiniPure Donkey anti-Mouse IgG               | Jackson<br>ImmunoResearch                            | Cat# 715-546-151,<br>RRID: AB_2340850 |
| Alexa Fluor 488-AffiniPure Donkey anti-Rat IgG                 | Jackson<br>ImmunoResearch                            | Cat# 712-546-153,<br>RRID: AB_2340686 |
| Alexa Fluor 488-AffiniPure Donkey anti-Guinea Pig IgG          | Jackson<br>ImmunoResearch                            | Cat# 706-546-148,<br>RRID: AB_2340473 |
| Cy3-AffiniPure Donkey anti-Rabbit IgG                          | Jackson<br>ImmunoResearch                            | Cat# 711-165-152,<br>RRID: AB_2307443 |
| Cy3-AffiniPure Donkey anti-Mouse IgG                           | Jackson<br>ImmunoResearch                            | Cat# 715-165-151,<br>RRID: AB_2315777 |
| Cy3-AffiniPure Donkey anti-Rat IgG                             | Jackson<br>ImmunoResearch                            | Cat# 712-166-153,<br>RRID: AB_2340669 |
| Alexa Fluor 647-AffiniPure Donkey anti-Guinea Pig IgG          | Jackson<br>ImmunoResearch                            | Cat# 706-605-148,<br>RRID: AB_2340476 |
| Alexa Fluor 647-AffiniPure Donkey anti-Rabbit                  | Jackson<br>ImmunoResearch                            | Cat# 711-605-152,<br>RRID: AB_2492288 |
| Alexa Fluor 647-AffiniPure Donkey anti-Goat                    | Jackson<br>ImmunoResearch                            | Cat# 705-606-147,<br>RRID: AB_2340438 |
| Cy5-AffiniPure Donkey anti-Rat IgG                             | Jackson<br>ImmunoResearch                            | Cat# 712-175-153,<br>RRID: AB_2340672 |
| Cy5-AffiniPure Donkey anti-Mouse IgG                           | Jackson<br>ImmunoResearch                            | Cat# 715-605-151,<br>RRID: AB_2340863 |
| DyLightTM405-AffiniPure Goat Anti-Armenian Hamster IgG         | Jackson<br>ImmunoResearch                            | Cat# 127-475-160<br>RRID: AB_2338994  |
| Alexa Fluor Plus 555-Highly Cross-Adsorbed Goat anti-Mouse IgG | Thermo Fisher Scientific                             | Cat# A32727<br>RRID: AB_2633276       |
| Alexa Fluor Plus 488-Cross-Adsorbed Goat anti-Chicken IgY      | Thermo Fisher Scientific                             | Cat# A32931<br>RRID: AB_2762843       |

|                                                          |                                                    |                                   |
|----------------------------------------------------------|----------------------------------------------------|-----------------------------------|
| Anti-Mouse IgG (H+L), HRP conjugate                      | Promega                                            | Cat# W4021,<br>RRID: AB_430834    |
| Anti-Rabbit IgG (H+L), HRP conjugate                     | Promega                                            | Cat# W4011,<br>RRID: AB_430833    |
| Anti-Rat IgG (H+L), HRP conjugate                        | Thermo Fisher Scientific                           | Cat# 62-9520,<br>RRID: AB_2533965 |
| <b>Bacterial Strains</b>                                 |                                                    |                                   |
| BL21-DE3 Competent cells                                 | NEB                                                | Cat# C2530H                       |
| DH5- $\alpha$ Competent cells                            | Thermo Fisher Scientific                           | Cat# 18265017                     |
| <b>Chemicals and Recombinant Proteins</b>                |                                                    |                                   |
| Matrigel                                                 | BD Biosciences                                     | Cat# 354230                       |
| Poly-D-lysine solution                                   | Thermo Fisher Scientific                           | Cat# A3890401                     |
| Poly-L-Lysine solution                                   | Sigma-Aldrich                                      | Cat# P4707                        |
| Cytosine arabinoside (AraC)                              | Brunschwig                                         | Cat# CAY16069                     |
| Nocodazole Ready Made Solution<br>5 mg/mL, DMSO solution | Sigma-Aldrich                                      | Cat# SML1665                      |
| Cupric chloride dihydrate – suitable for cell culture    | Sigma-Aldrich                                      | C3279                             |
| Bathocuproinedisulfonic acid disodium salt               | Santa Cruz<br>Biotechnology                        | Sc-217698                         |
| Copper Fluor-4 (CF4) probe                               | (Xiao <i>et al.</i> , 2018)                        | N/A                               |
| Control Copper Fluor-4 Sulfur 2 (Ctrl-CF4-S2) probe      | (Xiao <i>et al.</i> , 2018)                        | N/A                               |
| Trace-metals grade concentrated nitric acid              | VWR (Normatom)                                     | Cat# 83872.290                    |
| ICP standard mono-element solution of rhodium            | SCP Science                                        | Cat# 140-052-450                  |
| ICP standard mono-element solution of copper             | SCP Science                                        | Cat# 140-051-290                  |
| GST-human PDZD11                                         | Citi Laboratory<br>(Guerrera <i>et al.</i> , 2016) | S1743                             |
| GST-human PDZD11-Nter. (1-30)                            | Citi Laboratory (Rouaud<br><i>et al.</i> , 2020)   | S2034                             |
| GST-human PDZD11- $\Delta$ 24 (25-140)                   | Citi Laboratory (Rouaud<br><i>et al.</i> , 2020)   | S2032                             |
| GST- human PLEKHA7-WW (1-162)                            | Citi Laboratory<br>(Guerrera <i>et al.</i> , 2016) | S1792                             |
| GST-human PLEKHA5-WW (1-120)                             | Citi Laboratory (This<br>paper)                    | S2084                             |
| GST-human PLEKHA5-Cter (817-1116)                        | Citi Laboratory (This<br>paper)                    | S2085                             |
| GST-human PLEKHA6-WW (1-116)                             | Citi Laboratory (This<br>paper)                    | S2086                             |
| GST-human PLEKHA6-Cter (971-1297)                        | Citi Laboratory (This<br>paper)                    | S2087                             |
| <b>Critical Commercial Assays</b>                        |                                                    |                                   |
| DNeasy Blood and Tissue kit                              | QIAGEN                                             | Cat# 69504                        |
| Lipofectamine 2000                                       | Invitrogen                                         | Cat# 11668027                     |
| jetOPTIMUS DNA Transfection Reagent                      | Polyplus                                           | Cat# 117-15                       |
| Polyethylenimine, Linear, MW 25000                       | Polysciences                                       | Cat# 23966-2                      |
| Pierce Glutathione Magnetic Agarose Beads                | Thermo Fisher Scientific                           | Cat# 78602                        |
| Pierce Cell Surface Protein Isolation Kit                | Thermo Fisher Scientific                           | Cat# 89881                        |
| Dynabeads protein G for Immunoprecipitation              | Thermo Fisher Scientific                           | Cat# 1004D                        |
| Dynabeads protein A for Immunoprecipitation              | Thermo Fisher Scientific                           | Cat# 1001D                        |
| Protease inhibitor cocktail                              | Thermo Fisher Scientific                           | Cat# A32965                       |
| Protease and phosphatase inhibitor cocktail              | Thermo Fisher Scientific                           | Cat# A32959                       |
| NucleoSpin RNA Purification Kit                          | Macherey-Nagel                                     | Cat# 740955.50                    |

|                                                                                        |                                                                        |                      |
|----------------------------------------------------------------------------------------|------------------------------------------------------------------------|----------------------|
| iScript cDNA Synthesis Kit                                                             | Bio-Rad                                                                | Cat# 1708891         |
| SYBR Select Master Mix for CFX                                                         | Thermo Fisher Scientific<br>(Life Technologies)                        | Cat# 4472942         |
| <b>Deposited Data</b>                                                                  |                                                                        |                      |
| GTEEx Analysis Release V8 - dbGaP Accession phs000424.v8.p2                            | GTEEx portal                                                           | gtexportal.org/home/ |
| <b>Experimental Models: Cell Lines</b>                                                 |                                                                        |                      |
| Mouse cortical collecting duct cell line, mCCD WT N64-Tet-ON                           | Feraille Laboratory, Unige                                             | N/A                  |
| Mouse cortical collecting duct cell line, mCCD PLEKHA7-KO N64-Tet-ON                   | Citi Laboratory (Shah <i>et al.</i> , 2016; Shah <i>et al.</i> , 2018) | N/A                  |
| Mouse cortical collecting duct cell line, mCCD PDZD11-KO N64-Tet-ON                    | Citi Laboratory (Guerrera <i>et al.</i> , 2016)                        | N/A                  |
| Mouse cortical collecting duct cell line, mCCD PLEKHA6-KO N64-Tet-ON                   | Citi Laboratory (This paper)                                           | N/A                  |
| Mouse cortical collecting duct cell line, mCCD PLEKHA6/7-KO N64-Tet-ON                 | Citi Laboratory (This paper)                                           | N/A                  |
| Canine kidney proximal tubule cell line, MDCK-II WT Tet-OFF                            | Fanning Laboratory, U. North Carolina                                  | N/A                  |
| Canine kidney proximal tubule cell line, MDCK-II PLEKHA5-KO Tet-OFF                    | Citi Laboratory (This paper)                                           | N/A                  |
| Canine kidney proximal tubule cell line, MDCK-II PLEKHA6-KO Tet-OFF                    | Citi Laboratory (This paper)                                           | N/A                  |
| Human haploid cell lines, Hap1 WT, PLEKHA7-KO                                          | Amieva Laboratory, Standford (Popov <i>et al.</i> , 2015)              | N/A                  |
| Human haploid cell line, Hap1 PDZD11-KO                                                | Citi Laboratory (Shah <i>et al.</i> , 2018)                            | N/A                  |
| Human haploid cell line, Hap1 PLEKHA5-KO                                               | Citi Laboratory (This paper)                                           | N/A                  |
| Human haploid cell line, Hap1 PLEKHA5/7-KO                                             | Citi Laboratory (This paper)                                           | N/A                  |
| Mouse ciliated embryonic aorta-derived endothelial cell line, meEC                     | Kwak Laboratory, Unige                                                 | N/A                  |
| Mouse brain microvascular endothelial (endothelioma) cell line, bEnd.3                 | Imhof Laboratory, Unige                                                | N/A                  |
| Human umbilical vascular endothelial cells, HUVEC                                      | Imhof Laboratory, Unige                                                | N/A                  |
| Mouse heart endothelial cell line, H5V                                                 | Lampugnani Laboratory, IFOM,                                           | N/A                  |
| Human lung carcinoma cell line, A427                                                   | Paggi Laboratory, Regina Elena NCI                                     | N/A                  |
| Human embryonic kidney, HEK293T                                                        | ATCC                                                                   | N/A                  |
| Mouse mammary epithelial cell line, Eph4                                               | Reichmann Laboratory, Hebrew University of Jerusalem                   | N/A                  |
| Human intestinal carcinoma cell line, Caco-2 BBE                                       | Dr. Wangsun Choi, Harvard Medical School                               | N/A                  |
| Human keratinocyte cell line, HaCaT                                                    | Fontao Laboratory, Unige                                               | N/A                  |
| <b>Oligonucleotides</b>                                                                |                                                                        |                      |
| CRISPR targets sequences: mouse PLEKHA6<br>GGTTCATAGAGCTTTTGCGC<br>GCCAGTCTTTATGACGAGC | This paper                                                             | N/A                  |

|                                                                                                         |                                                    |       |
|---------------------------------------------------------------------------------------------------------|----------------------------------------------------|-------|
| Genotyping primers: mouse PLEKHA6<br>gaggaattcCCAAGTTACCCCGAGAAGGG<br>gagaagcttGGGAGGAGAGGACGTACCAT     | This paper                                         | N/A   |
| CRISPR target sequence: human PLEKHA5<br>AATGCACCGGTTGTACAGACG                                          | This paper                                         | N/A   |
| Genotyping primers: human PLEKHA5<br>CAGGTAGGACAAAATACTGCCAC<br>CTGAAACCTAGCTGCAAACCTGG                 | This paper                                         | N/A   |
| CRISPR target sequence: dog PLEKHA5<br>TGGACTTACGGGATCACCCG                                             | This paper                                         | N/A   |
| CRISPR target sequence: dog PLEKHA6<br>CCACCCGAATGTTGATGAGC                                             | This paper                                         | N/A   |
| Genotyping primers: dog PLEKHA6<br>gaggaattcAAGCTGCTGGGCAAATTGTGTGA<br>gagaagcttCCAGAACTACCGTCCAAGCAGCC | This paper                                         | N/A   |
| qPCR mouse metallothionein-I<br>Fw: GAATGGACCCCAACTGCTC<br>Rv: GCAGCAGCTCTTCTTGACG                      | (Wunderlich <i>et al.</i> , 2010)                  | N/A   |
| qPCR mouse GAPDH<br>Fw: GTGCAGTGCCAGCCTCGTCC<br>Rv: CTCGGCCTTGACTGTGCCGT                                | Citi Laboratory (This paper)                       | N/A   |
| <b>Recombinant DNA</b>                                                                                  |                                                    |       |
| pcDNA3.1(zeo+) human PDZD11-HA                                                                          | Citi Laboratory<br>(Guerrera <i>et al.</i> , 2016) | S1766 |
| pcDNA3.1(zeo+) GFP-human PDZD11-myc                                                                     | Citi Laboratory<br>(Guerrera <i>et al.</i> , 2016) | S1744 |
| pTRE2hyg YFP-human PLEKHA7-myc                                                                          | Citi Laboratory<br>(Paschoud <i>et al.</i> , 2014) | S1431 |
| pTRE2hyg YFP-human PLEKHA7-Nter (1-562)-myc                                                             | Citi Laboratory<br>(Paschoud <i>et al.</i> , 2014) | S1432 |
| pEGFP-N3 human Tspan15                                                                                  | Citi Laboratory (Shah <i>et al.</i> , 2018)        | S2152 |
| pEGFP-N1 human Tspan33                                                                                  | Citi Laboratory (Shah <i>et al.</i> , 2018)        | S2154 |
| pcDNA3.1(zeo+) CFP-HA                                                                                   | Citi Laboratory<br>(Guerrera <i>et al.</i> , 2016) | S1150 |
| pcDNA3.1(-) GFP-myc                                                                                     | Citi Laboratory<br>(Paschoud <i>et al.</i> , 2011) | S1166 |
| pTRE2hyg YFP-myc                                                                                        | Citi Laboratory<br>(Paschoud <i>et al.</i> , 2014) | S1210 |
| pTRE2hyg YFP-human PLEKHA5-myc                                                                          | Citi Laboratory (This paper)                       | S2082 |
| pTRE2hyg YFP-human PLEKHA6-myc                                                                          | Citi Laboratory (This paper)                       | S2083 |
| pcDNA3.1(-) GFP-human PLEKHA5                                                                           | Citi Laboratory (This paper)                       | S2530 |
| pcDNA3.1(-) GFP-human PLEKHA6                                                                           | Citi Laboratory (This paper)                       | S2531 |
| pcDNA3.1(-) HA-human PLEKHA5                                                                            | Citi Laboratory (This paper)                       | S2567 |
| pcDNA3.1(-) HA-human PLEKHA6                                                                            | Citi Laboratory (This paper)                       | S2568 |
| pcDNA3.1(-) HA-human PLEKHA7 Nter (1-562)                                                               | Citi Laboratory (This paper)                       | S2589 |

|                                                                   |                              |                  |
|-------------------------------------------------------------------|------------------------------|------------------|
| pcDNA3.1(-) GFP-human ATP7A-Cter WT (1462-1500)                   | Citi Laboratory (This paper) | S2698            |
| pcDNA3.1(-) GFP-human ATP7A-Cter $\Delta$ PDZ-binding (1462-1496) | Citi Laboratory (This paper) | S2699            |
| pSpCas9(BB)-2A-GFP (px458)                                        | (Ran <i>et al.</i> , 2013)   | Addgene #48138   |
| <b>Softwares and Algorithms</b>                                   |                              |                  |
| FIJI                                                              | NIH                          | RRID: SCR_002285 |
| Adobe Photoshop                                                   | Adobe                        | RRID: SCR_014199 |
| Adobe Illustrator                                                 | Adobe                        | RRID: SCR_010279 |
| T-Coffee (version 8.93)                                           | EMBL-EBI                     | RRID: SCR_011818 |
| NCoils (version 1)                                                | Expasy_Embnet                | RRID: SCR_008440 |
| PROSITE                                                           | Expasy                       | RRID: SCR_003457 |
| WebLogo 3.7.4                                                     | weblogo.threeplusone.com/    | RRID: SCR_010236 |
| Image Studio Lite                                                 | LI-COR                       | RRID: SCR_013715 |
| SnapGene                                                          | N/A                          | RRID: SCR_015052 |
| Prism 8                                                           | GraphPad                     | RRID: SCR_002798 |
